1 **A unifying model to explain high nirmatrelvir therapeutic efficacy, low post-exposure**  
2 **prophylaxis efficacy, and frequent viral rebound**  
3

4  
5 **Authors**

6 Shadisadat Esmaeili,<sup>1\*</sup>† Katherine Owens,<sup>1†</sup> Jessica Wagoner,<sup>2</sup> Stephen J. Polyak,<sup>2</sup> Judith M.  
7 White,<sup>3</sup> Joshua T. Schiffer<sup>1,2</sup>  
8

9 **Affiliations**

10 <sup>1</sup>Vaccine and Infectious Disease Division, Fred Hutchinson Cancer Center; Seattle, WA, USA.

11 <sup>2</sup>Department of Medicine, University of Washington; Seattle, WA, USA.

12 <sup>3</sup>Department of Cell Biology, University of Virginia; Charlottesville, VA, USA.

13 \*Corresponding Author: [sesmaeil@fredhutch.org](mailto:sesmaeil@fredhutch.org)

14 † These authors contributed equally to this work.  
15

16 **Abstract**

17 In a pivotal trial, a 5-day course of oral ritonavir-boosted nirmatrelvir, given early during  
18 symptomatic infection, decreased hospitalization and death by 89.1% and reduced nasal viral  
19 load by 0.87 log relative to placebo in high-risk individuals. Yet, ritonavir-boosted nirmatrelvir  
20 failed as post-exposure prophylaxis in a follow-up trial, and frequent viral rebound has been  
21 observed in the community. We developed a mathematical model capturing viral-immune  
22 dynamics and nirmatrelvir pharmacokinetics that recapitulated viral loads from this and  
23 another clinical trial. Our results suggest that nirmatrelvir's *in vivo* potency is significantly  
24 lower than *in vitro* assays predict. A maximally potent agent would reduce the viral load by  
25 approximately 3.5 logs relative to placebo at 5 days. The model identifies that earlier initiation  
26 and shorter treatment duration are key predictors of post-treatment rebound. Extension of early  
27 symptomatic treatment to 10 days and post-exposure prophylaxis to 15 days, rather than  
28 increasing dose or dosing frequency, is predicted to significantly lower the incidence of viral  
29 rebound.  
30  
31

## 32 Introduction

33 The SARS-CoV-2 main protease inhibitor nirmatrelvir is a drug plagued by  
34 contradictions. In a landmark, randomized, double-blinded, placebo-controlled clinical  
35 trial with 1364 analyzed individuals, 300 mg of nirmatrelvir boosted with 100 mg  
36 ritonavir was given twice daily for five days to high-risk individuals with SARS-CoV-2  
37 infection within 3 days of developing symptoms. Compared to placebo, nirmatrelvir  
38 reduced the combined outcome of hospitalization and death by 89%, eliminated death  
39 as an outcome, and reduced viral load by 0.87 log after 5 days of treatment(1). This  
40 critical result prompted the Food and Drug Administration (FDA) to issue an  
41 Emergency Use Authorization(2). The drug became the most widely prescribed  
42 antiviral for SARS-CoV-2 in the United States, likely preventing thousands of  
43 hospitalizations and many deaths(3). Ritonavir boosted nirmatrelvir was recently  
44 licensed by the FDA based on its continued effectiveness and safety(4) and has  
45 outperformed other antivirals in terms of hospitalization and viral load reduction(5).

46 However, the use of nirmatrelvir/ritonavir in real-world cohorts has identified viral  
47 rebound as a significant issue. Viral rebound occurred in 14.2% of individuals in one  
48 large cohort and was usually associated with recrudescence of symptoms, though  
49 protection against hospitalization and death appeared to be maintained(6) and remains  
50 significant despite high rates of population immunity due to vaccination and prior  
51 infection(7). Similar rates of viral rebound were observed between molnupiravir and  
52 nirmatrelvir, suggesting the rebound effect is not drug-specific and may pertain to  
53 characteristics of SARS-CoV-2 infection and treatment duration(8). This high  
54 incidence of viral rebound exceeded the 2.3% rate observed in the proof-of-concept  
55 trial, which did not differ from placebo(9).

56 Despite its high efficacy as an early symptomatic therapy for high-risk individuals,  
57 nirmatrelvir/ritonavir was not authorized for use as post-exposure prophylaxis (PEP). In  
58 a clinical trial of post-exposure prophylaxis, nirmatrelvir/ritonavir showed 32% and  
59 37% reductions in symptomatic COVID-19 relative to placebo when given for five or  
60 ten days respectively(10). However, neither of these results reached statistical  
61 significance. Notably, molnupiravir, another drug that reduced hospitalization when  
62 given during early symptomatic infection, also failed as post-exposure prophylaxis(11).  
63 Only long-acting monoclonal antibodies have demonstrated efficacy for post-exposure  
64 prophylaxis(12–14), but these are no longer active against prevalent circulating  
65 strains(15).

66 Early during the COVID-19 pandemic, multiple groups employed mathematical models  
67 to predict the outcomes of clinical trials for SARS-CoV-2(16–22). These models all  
68 accurately predicted that antiviral therapy that was insufficiently potent or given too  
69 late during infection might fail to provide clinical benefit(16–19, 21). Our previous  
70 modeling results further suggested that viral rebound may occur and was more likely if  
71 a drug was dosed during the pre-symptomatic phase of infection when viral loads are  
72 still expanding, as occurs in a post-exposure prophylaxis scenario(23). The proposed  
73 mechanism of this effect was that reducing viral load may blunt early immune  
74 responses and preserve susceptible cells, allowing viral re-expansion upon cessation of  
75 treatment that was of insufficient potency to eliminate all infected cells(24). The model  
76 suggested that this phenomenon could theoretically occur during early symptomatic  
77 treatment as well. At the time, we downplayed the significance of model-generated  
78 rebound as the phenomenon had yet to be demonstrated clinically. However, models fit  
79 to rebound data now suggest a similar mechanism of action to explain viral  
80 rebound(25).

81 Here we use an updated model for SARS CoV-2 viral kinetics that was first validated  
82 against a much larger panel of untreated individuals to precisely simulate the virologic  
83 outcomes of two nirmatrelvir/ritonavir trials. We identify that the true *in vivo* potency  
84 of nirmatrelvir is approximately significantly less than its *in vitro* potency, such that  
85 drug levels are sub-therapeutic during a portion of the dosing interval. Viral rebound is  
86 observed in our simulations and is more likely when the drug is dosed early during  
87 infection and is not reduced with a higher dose or dosing frequency. Extended-duration  
88 treatment is identified as the best strategy to avoid viral rebound.

89

## 90 Results

### 91 Viral Dynamic, Pharmacokinetic, and Pharmacodynamic Mathematical models

92 To derive parameters for simulating nasal viral loads in the absence of therapy, we used  
93 the mechanistic mathematical model that best recapitulated 1510 SARS-CoV-2  
94 infections in a cohort of 2678 SARS-CoV-2 infected individuals from the National  
95 Basketball Association cohort (Error! Reference source not found.a) (26). The model is  
96 target-cell limited due to a finite number of susceptible cells. An eclipse phase delays  
97 viral production by infected cells. In keeping with an early interferon-mediated innate  
98 immune response, susceptible cells can become refractory to infection based on the  
99 total number of productively infected cells but also revert to susceptible at a constant  
100 rate. Infected cells are cleared by cytolysis and early immune response at a constant rate  
101 and delayed acquired immunity, which is activated in a time-dependent fashion. We  
102 used a mixed-effect population approach implemented in Monolix to estimate model  
103 parameters (Fig S1, Table S1).

104 To reproduce levels of nirmatrelvir, we used a two-compartment pharmacokinetic (PK)  
105 model (Error! Reference source not found.b). Using Monolix and the mixed-effect  
106 population approach, we estimated parameter values by fitting the model to the plasma  
107 concentration of healthy subjects. The model closely recapitulated observed drug levels  
108 following a single dose of 250mg/100mg of nirmatrelvir/ritonavir (Fig S2, Table S2).  
109 The effect of ritonavir as an inhibitor of nirmatrelvir's metabolism is accounted for in  
110 the nirmatrelvir's clearance rate in the PK model. We also fit the model to the  
111 population level plasma concentrations following a single dose of 250mg/100mg and  
112 750mg/100mg showing that the estimated parameters are dose-independent (Table S3).

113 For the pharmacodynamic (PD) model, we assumed the efficacy of the drug follows a  
114 Hill equation with respect to the drug concentration. We parameterized the Hill  
115 equation using *in vitro* efficacy data collected at different concentrations of nirmatrelvir  
116 (details in Materials and Methods, Fig S3, Table S4).

117 To estimate the *in vivo* potency of nirmatrelvir/ritonavir, we fit our model to the viral  
118 load drop from the baseline of the control and treatment arms of two randomized,  
119 controlled trials: the EPIC-HR trial with 1574 high-risk unvaccinated symptomatic  
120 individuals (trial 1)(1) and the PLATCOV trial with 144 low-risk, symptomatic  
121 individuals (trial 2) (5). To generate placebo arms for each trial with matched viral  
122 variants and vaccine status, we simulated the viral load of 400 randomly selected  
123 individuals from the unvaccinated symptomatic subgroup of the NBA cohort (for  
124 EPIC-HR) and symptomatic individuals with Omicron infection (for PLATCOV),  
125 using their estimated individual viral load parameters. For their symptom onset, we  
126 randomly assigned all individuals an incubation period selected from a gamma  
127 distribution with parameters associated with each participant's variant reported in the

128 literature (27). The mean viral load drop from the baseline recapitulated the mean  
129 change from the baseline of the viral load observed in the control arms of both trials  
130 (Error! Reference source not found. **a and 3a**).

131 To simulate the treatment arm, we combined viral dynamics, PK, and PD models. Sets  
132 of VL parameters for individuals were again drawn from the NBA cohort following the  
133 same criteria as in the control arm to match the cohort characteristics of each trial as  
134 closely as possible. The PK and PD parameters for all simulated individuals were  
135 randomly drawn from their estimated population distributions. The efficacy of the  
136 treatment was calculated from the Hill equation using plasma concentrations of the  
137 drug obtained from the PK model. The efficacy of the treatment was used to lower the  
138 viral reproduction rate (details in **Materials and Methods, Fig 1**).

### 139 **Reduction of *in vivo* nirmatrelvir potency relative to *in vitro***

140 To obtain PD parameters of nirmatrelvir, we fit the Hill equation to the *in vitro* efficacy  
141 of the drug as a function of its concentration (**Fig S3**). However, the *in vivo* potency of  
142 a drug is known to be different from values measured *in vitro* (23, 28, 29). The potency  
143 reduction factor (prf) is defined as the ratio between the *in vivo* and *in vitro* IC<sub>50</sub>. Here  
144 the *in vivo* IC<sub>50</sub> is the plasma drug concentration required to inhibit viral replication by  
145 50%. To identify the *in vivo* potency of nirmatrelvir, we estimated the prf that achieved  
146 the best fit between our VL+PKPD model and the average drop in viral load of the  
147 treatment arm of the two clinical trials (**Figs 2b and 3b**).

148 To estimate the prf, we simulated the viral load of our virtual cohort of 400 individuals  
149 treated with 300 mg of nirmatrelvir twice per day for five days with prf ranging from 1  
150 (no reduction in potency) to 120. The treatment start day was randomly selected from a  
151 uniform distribution for each simulated individual to be within 3 days of symptom  
152 onset. We fit the average change from baseline in simulated viral load data of the  
153 treatment arm to the trial data. We then plotted the coefficient of determination, R<sup>2</sup>, of  
154 the fit against different prf values (**Figs 2c and 3c**). The best value (prf = 61 for the fit  
155 to EPIC-HR and prf=37 when fitting to PLATCOV) was determined by maximizing the  
156 R<sup>2</sup> of the fit. Our model closely recapitulated viral load reduction in the treatment arm  
157 of both trials (**Figs 2b and 3b**). We repeated the simulation 10 times and used these  
158 replicates to estimate the standard error of the prf. Accordingly, the boxplot in the  
159 lower panel of **Figs 2c and 3c** represents the standard error of the prf average value and  
160 does not reflect individual variability.

161 The reason for slight differences in estimated prfs between the two trials is unknown.  
162 Possible explanations include different sampling methods (nasal swabs in EPIC-HR  
163 versus oropharyngeal swabs in PLATCOV) or different participant characteristics  
164 (high-risk adults in EPIC-HR versus lower-risk adults without comorbidities in  
165 PLATCOV).

### 166 **Estimates of optimal viral load reduction with an optimal drug**

167 To illustrate the importance of estimating *in vivo* potency of the drug, we compared the  
168 PKPD projection and average change in viral load of treatment arms with prf = 1 (no  
169 reduction in potency) and prf = 61. With an approximately 61-fold weaker potency, the  
170 drug levels dropped below the therapeutic level shortly after each dose and antiviral  
171 effect subsided in less than a day after the end of treatment leading to an average  
172 efficacy of 82% over the first 5 days of treatment (**Fig 2d, e**). However, the plasma  
173 concentration of a perfectly potent drug (prf = 1) remained above therapeutic levels for  
174 the duration of the treatment with a 5-day average efficacy of 99.99% and the effect

175 persisted for nearly 10 days (**Fig 2e**). With the perfectly potent drug ( $\text{prf} = 1$ ), with  
176 assumed *in vitro* potency level, the same treatment regimen could reduce the viral load  
177 by approximately 3.5 logs at day 5 relative to the placebo compared to the 0.87 log  
178 reduction reported in the trial (**Fig 2f**).

179 In estimating nirmatrelvir's *in vitro* pharmacodynamic parameters, we assumed only  
180 the  $\text{IC}_{50}$  differs *in vivo*. To confirm the validity of this assumption, we repeated the  
181 simulation of the treatment arm of EPIC-HR with different combinations of the potency  
182 reduction factor and the Hill coefficient. **Fig S4** shows that the best fit always happened  
183 for  $\text{prf} \sim 60$  and was independent of the Hill coefficient.

184 The potency reduction factor was more sensitive to certain PK parameters (**Fig S5**),  
185 particularly the drug's clearance rate ( $\kappa_{CL}$ ). If the drug is assumed to be cleared from  
186 the body more rapidly (larger  $\kappa_{CL}$ ), then it would need to be more potent (smaller  $\text{prf}$ ) to  
187 provide the same effect observed in the clinical trial. However, this did not impact our  
188 simulations of different dosing regimens since PK parameters were independent of the  
189 dose (**Table S3**). In simulations of different dosing regimens, we therefore use  
190 estimated PK parameters and  $\text{prf}$  distributions from EPIC-HR for all dosing regimens.

### 191 **Model recapitulation of PLATCOV participant variability**

192 Our model accurately reproduced mean reduction in viral load on multiple post-  
193 treatment days in EPIC-HR (**Fig 2b**) and PLATCOV (**Fig 3b**). However, it also  
194 predicted variable virologic responses at the individual level, including some instances  
195 of viral increase in the days following therapy. To test whether our model reproduced  
196 individual level heterogeneity within the trial, we compared simulated and actual  
197 distributions of viral load change in the control and treatment arms of the PLATCOV  
198 trial. On most post-treatment days, these distributions were not statistically dissimilar  
199 (**Fig 3d, e**). Wider distributions of observed versus simulated viral load change were  
200 noted on post-randomization days 1 and 2 in the control and days 1 and 4 in the  
201 treatment arm (**Fig 3d, e**) perhaps due to noise in viral load data from oral swabs: wide  
202 variability was noted between oral samples collected from PLATCOV participants at  
203 equivalent timepoints, particularly on day 1 and 2 (**Fig S6**).

### 204 **Frequent viral rebound on nirmatrelvir**

205 To assess whether our model generated viral rebound, we performed simulations  
206 assuming parameter values obtained from fitting the model to data from the EPIC-HR  
207 trial (**Fig 2**) and randomly drew individual  $\text{prf}$  values from the obtained distribution in  
208 **Fig 2c**. We performed simulations from the time of infection to 30 days after symptom  
209 onset and monitored viral load continually. We defined rebound in the control arm as  
210 any case with at least two peaks in the viral load trajectory with minimum heights of 3  
211 logs and a second peak higher than its minimum by at least 1 log (**Fig S7a**). We defined  
212 rebound in the treatment arm as any instance in which a post-treatment viral load  
213 exceeded the viral load at the end of the treatment by 1 log (**Fig S7b**).

214 By this definition, we observed rebound in 21.6% of cases treated with the clinical trial  
215 dose and 3.78% of controls (**Fig 4b**). When an equivalent definition of rebound was  
216 used as in the trial (1 log increase in viral load 5 days after treatment cessation), the  
217 probability of rebound was lower (6.65% if treatment was assumed to begin several  
218 days after symptoms), closer to that of the controls, and comparable to that observed in  
219 the trial (**Fig S8**).

### 220 **Limited impact of nirmatrelvir dose or dosing frequency on viral rebound**

221 We next explored different treatment regimens to estimate their impact on lowering  
222 viral load and the chance of rebound. We simulated the therapy with 150, 300, 600, and  
223 900 mg doses administered twice per day for 5 days, starting within 3 days post  
224 symptom onset. A larger dose decreased viral load more significantly and quickly than  
225 300 mg twice daily. 900 mg of nirmatrelvir reduced the viral load by a mean of 2 logs  
226 on day 2 and a mean of 4 logs on day 5 compared to the control (**Fig 4a**).

227 Individual viral loads were highly variable within each treatment group regardless of  
228 dose (**Fig 4a**). This was due to several factors including heterogeneous viral load  
229 trajectories (**Fig S1**) and different timing of treatment. Responses to treatment differed  
230 substantially according to viral load trajectory and treatment timing as well (**Fig 4c**). In  
231 nearly every case, the reduction in viral load was greater during the first 5 days of  
232 treatment with higher doses. However, this only impacted viral elimination in certain  
233 cases (**Fig 4c,i**). Sometimes viral load equilibrated to similar levels post-treatment  
234 regardless of dose (**Fig 4c, ii**), while in other cases, higher doses were associated with  
235 rebound (**Fig 4c, iii & iv**). By achieving a lower post-treatment viral load nadir, higher  
236 doses resulted in a greater likelihood of viral rebound in our simulations (**Fig 4b**).

237 Increasing frequency of antiviral dosing had nearly equivalent effects to increasing the  
238 dose, leading to a more rapid reduction in viral load (**Fig S9a**), heterogeneous effects  
239 based on viral load trajectory and timing of treatment (**Fig S9c**), and increased chance  
240 of rebound (**Fig S9b**).

#### 241 **Early treatment as a predictor of SARS-CoV-2 rebound**

242 We next simulated therapy with four different timings of treatment: post-exposure  
243 prophylaxis (PEP): 0-1 day after infection in the pre-symptomatic phase; early  
244 treatment: 0-1 day after symptom onset as often occurs in community settings;  
245 intermediate treatment: 1-5 days after symptom onset as in the clinical trial; and late  
246 treatment: 5-10 days after symptom onset. In all simulations, the administered dosage  
247 was 300mg twice per day for 5 days.

248 Applying treatment as PEP or shortly after symptoms lowered viral load more  
249 substantially relative to control than intermediate or late therapy at days 2 and 5 post-  
250 treatment, though intermediate and late strategies also significantly lowered viral load  
251 relative to control at these timepoints (**Fig 5a**). The boxplots for control groups in each  
252 panel in **Fig 5a** show the viral load at different points during the infection to match  
253 different timing of the treatment in the treatment arms. However, mean viral load was  
254 significantly higher in the PEP group versus the control group 10 days after the start of  
255 treatment (**Fig 5a**), due to the high probability of rebound (**Fig 5b, c**) when the virus is  
256 at its initial stages of expanding in the body and before the immune response is  
257 established in treated individuals.

#### 258 **Prolongation of treatment to reduce the probability of SARS-CoV-2 rebound**

259 Next, we analyzed the impact of treatment duration on viral rebound. We simulated  
260 treatment regimens with 300 mg nirmatrelvir given twice per day for 2, 5, 10, 15, and  
261 20 days. The treatment was again initiated within 3 days after symptoms appeared. **Fig**  
262 **6a** demonstrates the continuous drop in viral load if treatment was maintained until the  
263 infection was effectively cleared from the body. The viral load distributions of the  
264 treatment arms with 15 and 20 days of treatment on days 2, 5, and 10 were the same as  
265 the viral load distribution of the treatment arm with 10 days of treatment duration and,  
266 therefore, are not shown. Prolonging treatment duration to 20 days almost completely  
267 eliminated viral rebound (**Fig 6b,c**).

268 We next explored the impact of treatment duration on different treatment timing.  
269 Prolonging treatment to 15 days for early treatment and 20 days for PEP lowered the  
270 viral load close to the limit of detection (2 log) at the end of treatment and significantly  
271 lowered the probability of rebound (**Fig 7**).

## 272 **Differing observed rebound rates resulting from varying timing of sampling and** 273 **definitions**

274 Previous studies have defined rebound using criteria with varying virologic thresholds,  
275 timing, and sampling frequency (30). A rebound was sometimes defined when a  
276 positive test was observed after a negative test (31). In EPIC-HR, treatment was started  
277 within the first 5 days of symptoms (our intermediate treatment group) and rebound  
278 was defined as a 0.5 log increase on days 10 and/or 14. By this definition 2.3% of  
279 treated cases were classified as rebound (30). The probability of rebound in our  
280 simulation with a threshold of 0.5 log measured only on day 5 after the end of the  
281 treatment was 8.15% and decreased as thresholds for viral rebound increased (**Fig S8**).  
282 This percentage would be even lower if treatment started 3-5 days after symptoms  
283 (rather than 1-5 days) because the probability of rebound is very sensitive to the timing  
284 of treatment. We hypothesize that in EPIC-HR, participant enrollments were skewed to  
285 later during the first 5 day symptom window.

286 In our simulations, we recorded viral load every 0.001 of a day and used a 1 log  
287 threshold to identify rebound cases. This would be a more sensitive method to observe  
288 rebound and suggests that in trial and real-world cohorts, rebound is likely more  
289 common in treated individuals than is detected with less frequent sampling (**Fig S8**).

## 290 **Immune and viral mechanisms for viral rebound**

291 To understand mechanisms that might explain the increase in rebound in the PEP and  
292 early treatment groups, we simulated four treatment arms with the treatment starting on  
293 days 1, 4, 7, and 10 after infection. The start day was fixed for all individuals in each  
294 arm to limit the added variability introduced by a variable incubation period and timing  
295 of treatment relative to symptoms in our previous simulations. The high frequency of  
296 rebound in day 1 and day 4 treatment starts was evident from the viral load trajectories  
297 after the end of the treatment on days 5 and 9, respectively (**Fig 8a** top row), in many  
298 individual trajectories (grey lines) and to a less dramatic extent in mean viral load (blue  
299 line). A second peak after the end of the treatment was also seen in the dynamics of  
300 infected cells (**Fig 8a** middle row, blue line) and the intensity of the innate immune  
301 response (the rate of production of refractory cells) (**Fig 8a** bottom row).

302 Applying the treatment earlier during infection (day 1 and day 4 in the case of our  
303 simulations) lowered the viral load as well as the populations of infected and refractory  
304 cells, preserving susceptible cells. The ratio of susceptible to refractory cells in the two  
305 groups with earlier treatment starting points (day 1 and day 4) was significantly higher  
306 at the end of the treatment than in the control group at equivalent time points (**Fig 8b**).  
307 At each time point, innate immune responses were significantly diminished in treated  
308 individuals versus controls due to fewer infected cells (**Fig 8c**). Overall, a weaker  
309 innate immune response, higher availability of susceptible cells and persistence of  
310 infected cells after 5 days of treatment, allowed viral rebound after treatment cessation.

311 In a parallel manuscript, we subset shedding groups in the NBA cohort according to  
312 shedding kinetics using k-means clustering. The groups were ordered based on the area  
313 under their viral load curve (AUC) with group 1 having the smallest AUC and group 6  
314 the largest (**Fig S10a**). We simulated treatment with different treatment start days using

315 these 6 groups and identified the highest rebound probability in the earlier treatment  
316 groups with the larger AUC (groups 5 and 6) and longer time to peak viral load (groups  
317 3, 5, and 6) prior to antiviral therapy (**Fig S10b, c**). This indicates that viral rebound  
318 may be more likely in individuals who were destined for more severe infections had  
319 they not received therapy.

320

## 321 Discussion

322 We previously demonstrated for herpes simplex virus-2(32), HIV(33), Ebola virus(28),  
323 and SARS-CoV-2(23), that it is vital to consider the timing and intensity of the immune  
324 response to accurately simulate clinical trials of antiviral agents. If a direct-acting  
325 antiviral therapy is given too late during infection, then efficacy is often low because  
326 the disease is driven by excess inflammation and cytokine storm. On the other hand,  
327 concurrent immune pressure can provide critical assistance for antiviral agents to  
328 eliminate viral replication, as confirmed in recent studies(7). Accordingly, our previous  
329 modeling suggested that extremely early treatment of pre-symptomatic SARS-CoV-2  
330 as occurs with PEP requires higher drug potency than treatment during early  
331 symptomatic infection because innate immunity is activated to a greater extent at this  
332 slightly later stage of infection and fewer susceptible cells remain(23). It is increasingly  
333 clear that the potency and duration of antiviral therapy required to achieve clinical  
334 benefit depends strongly on the stage of infection and the ongoing intensity of the  
335 immune response.

336 Our prior work also demonstrated that *in vitro* antiviral drug potency measured in  
337 relevant cell culture lines often overestimates *in vivo* potency in humans(28, 29, 34).  
338 Specifically, the plasma drug level required to achieve 50% inhibition of cellular  
339 infections *in vivo* is higher than the level required to inhibit infection *in vitro*. The  
340 discrepancy between *in vitro* and *in vivo* potency can only be assessed by fitting viral  
341 dynamic / PKPD mathematical models to viral load data from clinical trials, as we have  
342 done here. Traditional PKPD models, which do not account for the dynamics of an  
343 immune response on observed viral loads, are not sufficient to estimate *in vivo* potency.  
344 Because *in vivo* potency reduction varies from 2 to 100 depending on the infection,  
345 antiviral agents(28, 32, 34), and population *in vivo* IC<sub>50</sub> must be assessed separately in  
346 each case.

347 Here by precisely fitting a combined viral-immune dynamic / PKPD model to viral load  
348 data from placebo and treatment groups in a randomized clinical trial as well as an  
349 open-label clinical trial of nirmatrelvir/ritonavir, we merge these two key concepts. We  
350 first identify that nirmatrelvir potency is reduced 60-70 fold *in vivo* relative to *in vitro*  
351 in the high-risk population and 30-40 fold in the healthy population. The difference  
352 between the estimated *in vivo* potency in these two populations can be explained by the  
353 differences in the demographics and sampling methods in the two trials. The  
354 mechanistic reasons for this reduction cannot be determined by the model but may  
355 include increased *in vivo* protein binding(35), inhibition of drug delivery from plasma to  
356 sites of infection, or differences in cellular uptake and drug metabolism *in vivo*(36).  
357 Nevertheless, our estimated *in vivo* IC<sub>50</sub> provides a benchmark plasma level to target in  
358 future trials. The PK model also demonstrates that the drug's relatively short half-life  
359 ( $t_{1/2}$ ) allows it to dip to subtherapeutic levels even when dosed twice daily.

360 Our model also develops a viable hypothesis for why nirmatrelvir is highly effective  
361 when given during early symptomatic infection but less so when given as post-exposure  
362 prophylaxis. By preventing a high peak viral load approximately 3-5 days after  
363 infection, therapy preserves susceptible cells and blunts the immediate, likely innate



364 immune response to SARS-CoV-2, while not completely eliminating infected cells. If  
365 the virus is not eliminated by an early acquired response along with antiviral pressure,  
366 it rebounds to a peak level that is sometimes comparable to the initial peak. We  
367 hypothesize that viral rebound occurs more frequently in community settings relative to  
368 the clinical trial. Infected individuals in the community are often prescribed the drug  
369 very early after symptom development, whereas in the trial, there was a natural 1 to 2-  
370 day delay based on the enrollment and consent process. Surprisingly, this short delay  
371 may have limited rebound while not affecting the primary endpoints of the trial, a  
372 finding supported by recent clinical studies(37), which nevertheless still suggest a clear  
373 benefit for earlier treatment in terms of preventing hospitalization in high-risk  
374 individuals(7). Notably, antiviral therapy is not a risk factor for rebound in our model or  
375 in clinical cohorts of individuals treated late during infection(38). High viral load  
376 shedding is also a risk factor for rebound in our model as has been suggested in other  
377 studies (39).

378 Our model identifies optimal conditions for viral rebound, which counterintuitively  
379 include early treatment during pre-symptomatic infection, which can be exacerbated by  
380 higher or more frequent dosing. Both mechanisms occur by suppressing the amount of  
381 infection and preserving susceptible cells, limiting the development of refractory cells,  
382 and dampening the intensity of the early immune response. The best method to prevent  
383 viral rebound is prolonging treatment, with a longer course needed for PEP. This  
384 finding is consistent with trials of long-acting monoclonal antibodies, which  
385 demonstrated efficacy as post-exposure prophylaxis(12–14).

386 Because the model is validated precisely against mean viral load reduction from two  
387 trials as well as individual viral kinetic distributions within each arm of one trial, it can  
388 be used as a tool to test various treatment strategies for future trials with the ability to  
389 vary therapeutic goals, timing of treatment, dose, dosing interval, and duration of  
390 therapy. Our prior PD modeling also allows testing of potentially synergistic  
391 combination agents and consideration of special hosts such as immunocompromised  
392 individuals with persistent infection who may be at risk of developing drug  
393 resistance(28, 40). We believe our approach provides a template for optimizing future  
394 trial designs with nirmatrelvir and other therapies.

395 Our model has several limitations. First, nasal or oropharyngeal viral load may not be a  
396 perfect surrogate of disease activity. On the one hand, viral load reduction has been  
397 correlated with beneficial clinical outcomes for nirmatrelvir(1), molnupiravir(41), and  
398 monoclonal antibodies(42). A recent review shows that viral load reduction is a  
399 reasonably good surrogate endpoint(42). Moreover, the viral rebound appears to track  
400 very closely with the symptomatic rebound in multiple case series(30). Yet, early  
401 remdesivir treatment provided a profound reduction in hospitalization while not  
402 impacting nasal viral load, albeit 5 days after completion of therapy (43). Data from  
403 non-human primates suggests that the drug has a specific effect on viral loads in the  
404 lungs that is not observed in upper airways, a finding that we were also able to capture  
405 with models(23). Overall, there is a strong suggestion from early treatment trials that a  
406 reduction in nasal viral loads beyond that observed in placebo-treated individuals is  
407 associated with substantial clinical benefit(1).

408 Another limitation is that the model does not account for drug resistance. While there  
409 has been limited evidence of de novo resistance during nirmatrelvir therapy, serial  
410 passage of virus suggests a relatively low barrier, and some viral rebound could, in  
411 theory, be with resistant variants. Studies to date suggest very little mutational change  
412 between the infecting and rebounding virus(44–47).

413 Our model does not capture immunity in literal terms. For instance, we do not  
414 distinguish innate interferon, antibody, and T-cell responses, as these have not been  
415 measured in sufficient longitudinal detail to precisely ascribe viral clearance to different  
416 components of the immune response. We structured the model for the early response to  
417 roughly map to innate responses, as the model term capturing the progression of  
418 susceptible cells to a refractory state diminishes with decreases in viral load and  
419 assumes no immune memory. The late immune response in our model has memory,  
420 leads to rapid elimination of the virus, and is likely to represent acquired immunity.  
421 While a more accurate model would discriminate different arms of the immune  
422 responses and fit to immune data, ours sufficiently captures the timing and intensity of  
423 immune responses for accurate clinical trial simulation.

424 Finally, it is our opinion that models lacking a spatial component cannot capture the  
425 full dynamics of target cell limitation, which is influenced by the packing structure of  
426 cells, dynamics of viral diffusion, and infection within multiple concurrent micro-  
427 environments(32). For these reasons, ordinary differential equations may misclassify  
428 the relative impact of target cell limitation and innate immune responses in the period  
429 surrounding peak viral load. However, our differential equation approach provides  
430 accurate output for clinical trial simulation.

431 In conclusion, our model identifies viable mechanistic underpinnings of the high  
432 efficacy of nirmatrelvir therapy for early symptomatic SARS-CoV-2 infection, lower  
433 efficacy for PEP, and high incidence of viral rebound in a real-world setting. The model  
434 can also be used to assess different treatment strategies and suggests prolonging therapy  
435 is the optimal method to avoid rebound and maintain potent early antiviral suppression.  
436

## 437 **Materials and Methods**

### 438 **Study Design**

439 We developed a viral dynamics model recapitulating the viral load data collected from  
440 symptomatic individuals in the NBA (National Basketball Association) cohort(48). We  
441 used a two-compartment model to reproduce the PK data of nirmatrelvir plus  
442 ritonavir(2). For the simulation, we constructed a virtual cohort by randomly selecting  
443 400 individuals from the NBA cohort, trying to match the trial populations regarding  
444 the vaccine status and history of infection, and assigning individual PK and PD  
445 parameters randomly drawn from their respective inferred distributions. We fit the  
446 combined viral dynamics and PK/PD model to the average change in viral load from  
447 the baseline of the control and treatment arms of the two previously published  
448 nirmatrelvir/ritonavir clinical trials (1, 5). By fitting our model to the control arms, we  
449 validated our viral dynamics model and how well the viral dynamics of our virtual  
450 cohort represent the trial control arms. We used the fit to the treatment arms to estimate  
451 the potency reduction factor (prf) by maximizing the  $R^2$  of the fit. With the estimated  
452 prf and *in vivo*  $IC_{50}$  of the drug, we explored different treatment regimens by changing  
453 dose, dosing frequency, treatment duration, and treatment timing, to find the best  
454 strategy to minimize the probability of rebound.

### 455 **Viral load data**

456 We used data from the symptomatic subpopulation of the NBA cohort published by  
457 Hay et al(48). The NBA cohort dataset consists of 2875 documented SARS-CoV-2  
458 infections in 2678 people detected through frequent PCR testing regardless of  
459 symptoms. 1510 infections in 1440 individuals had at least 4 positive quantitative

460 samples. We used the viral load data from the 1510 infections to estimate the viral load  
461 parameters.

## 462 **Clinical trial data**

463 We used viral load data from two nirmatrelvir/ritonavir clinical trials. EPIC-HR by  
464 Hammond et al. (1) included 682 and 697 symptomatic high-risk individuals in the  
465 control and treatment arms, respectively. We obtained the average change in viral load  
466 data of the control and treatment arms by digitizing Figure 3A of the manuscript(1).  
467 Nasal viral load was measured on days 0, 3, 5, 10, and 14 after the treatment start day  
468 and adjusted by the baseline viral load. PLATCOV by Schilling et al. (5) is an open-  
469 label, randomized, controlled adaptive trial with 85 and 59 symptomatic, young,  
470 healthy individuals in the control and nirmatrelvir treatment arms, respectively. The  
471 viral load samples from each participant were collected on days 0 through 7 and day 14  
472 after treatment start day. We used the individual viral load data made available by the  
473 authors. From PLATCOV, we averaged over the two oral samples collected from each  
474 individual and calculated viral load drop from baseline. In both trials, the study  
475 participants were treated with 300mg/100mg nirmatrelvir/ritonavir within three days  
476 (EPIC-HR) or four days (PLATCOV) of symptoms onset. The treatment was  
477 administered twice per day, for five days. We used EPIC-HR's lower limit of detection  
478 (2 log imputed as 1 log) in our simulations. However, when fitting to PLATCOV, we  
479 used the maximum LOD reported in the published data.

## 480 **PK data**

481 PK data of nirmatrelvir (PF-07321332) with ritonavir was obtained by digitizing Figure  
482 4 of the drug's Emergency Use Authorization document(2). The data is from a phase I  
483 randomized trial by Singh et al.(49) where eight participants (4 fed, 4 not fed) took a  
484 single dose of 250mg/100mg nirmatrelvir/ritonavir. The plasma concentrations of the  
485 drug in participants were recorded in the next 48 hours after dosing.

## 486 **PD data**

487 The data on drug efficacy comes from five replicates per condition, pooled from 2  
488 independent technical experimental repeats (one experiment with triplicate conditions,  
489 one experiment in duplicate conditions) performed at the University of Washington.  
490 The efficacy of Nirmatrelvir in the presence of CP-100356 (an efflux inhibitor (50))  
491 was measured against the delta variant of SARS-CoV2 in Calu-3 cells. The efflux  
492 inhibitor ensures consistent, adequate intracellular levels of drug. Briefly, Calu 3 cells  
493 human lung epithelial were treated with varying concentrations of nirmatrelvir in the  
494 presence of 2uM CP-100356 prior to infection with SARS-CoV-2 (delta isolate) at a  
495 multiplicity of infection of 0.01. Antiviral efficacy and cell viability (of non-infected  
496 cells treated with drugs) were assessed as described(51).

## 497 **Viral dynamics model**

498 We used our model of SARS-CoV-2 dynamics(26) to model the viral load dynamics of  
499 symptomatic individuals with SARS-CoV-2 infection. Our model assumes that  
500 susceptible cells ( $S$ ) are infected at rate  $\beta VS$  by SARS-CoV-2 virions. The infected  
501 cells go through a non-productive eclipse phase ( $I_E$ ) before producing viruses and  
502 transition to becoming productively infected ( $I_P$ ) at rate  $\kappa I_E$ . When encountering  
503 productively infected cells, the susceptible cells become refractory to infection ( $R$ ) at  
504 the rate  $\phi I_P S$ . Refractory cells revert to a susceptible state at rate  $\rho R$ . The productively  
505 infected cells are cleared at rate  $\delta I$  representing cytolysis and the innate immune  
506 response that lacks memory and is proportional to the amount of ongoing infection. If

507 the infection persists longer than  $\tau$ , then cytotoxic acquired immunity gets involved,  
 508 which is represented in our model by the rate  $mI_P$ . Finally, free virions are cleared at  
 509 the rate  $\gamma$ . Of note, this model, previously proposed by Ke et al. (52), was selected  
 510 against other models in(26) based on superior fit to data and parsimony. The model  
 511 written as a set of differential equations has the form,

512  
 513

$$514 \quad \frac{dS}{dt} = -\beta SV - \phi I_P S + \rho R \quad (1a)$$

$$515 \quad \frac{dR}{dt} = \phi I_P S - \rho R \quad (1b)$$

$$516 \quad \frac{dI_E}{dt} = \beta SV - \kappa I_E \quad (1c)$$

$$517 \quad \frac{dI_P}{dt} = \kappa I_E - \delta I_P - m(t)I_P \quad (1d)$$

$$518 \quad \frac{dV}{dt} = \pi I_P - \gamma V \quad (1e)$$

$$519 \quad \text{where } \begin{cases} m(t) = 0 & t < \tau \\ m(t) = m & t \geq \tau \end{cases} \quad (1f)$$

520

521 To estimate parameter values, we fit the model to viral load data from the NBA cohort  
 522 using a mixed-effect population approach implemented in Monolix.

523 We start the simulations with  $10^7$  susceptible cells. The initial value of the refractory  
 524 cells is assumed to be zero since the interferon signaling is not active prior to infection.  
 525 We further assume there are no infected cells (eclipse or productive) at the beginning of  
 526 the infection. We fix the level of inoculum ( $V_0$ ) at 97 copies/ml for each individual.

527 To resolve identifiability issues, we fixed two parameter values, setting the inverse of  
 528 the eclipse phase duration to  $\kappa = 4$ , the rate of clearance of virions to  $\gamma = 15(26)$ .

## 529 PK model

530 We used a two-compartmental PK model which includes the amount of drug in the GI  
 531 tract ( $A_{GI}$ ), the plasma compartment ( $A_p$ ), and the lung ( $A_L$ ). The drug is administered  
 532 orally, passes through the GI tract and gets absorbed into the blood at the rate  $\kappa_a$ . The  
 533 drug then transfers from the blood into the peripheral compartment (or the lung) at the  
 534 rate  $\kappa_{PL}$ . The metabolized drug transfers back into the plasma at the rate  $\kappa_{LP}$  from  
 535 where it clears from the body at the rate  $\kappa_{CL}$ . The model in the form of ordinary  
 536 differential equations is written as,

$$537 \quad \frac{dA_{GI}}{dt} = -\kappa_a A_{GI} \quad (2a)$$

$$538 \quad \frac{dA_p}{dt} = \kappa_a A_{GI} + \kappa_{LP} A_L - (\kappa_{CL} + \kappa_{PL}) A_p \quad (2b)$$

$$539 \quad \frac{dA_L}{dt} = \kappa_{PL} A_p - \kappa_{LP} A_L \quad (2c)$$

540

541 We used Monolix and a mixed-effect population approach to estimate the parameters  
 542 and their standard deviations. With the initial condition of ( $A_{GI} = Dose$ ,  $A_p = 0$ ,

543  $A_L = 0$ ); we fit  $C_p = \frac{A_p}{Vol}$  to the plasma concentration data where  $Vol$  is the estimated  
544 plasma volume.

### 545 **PD model**

546 For the pharmacodynamics model we used Hill equation,  $\epsilon(t) = \frac{E_{max}C(t)^n}{C(t)^n + IC_{50}^n}$ , where  $C(t)$   
547 is the drug's concentration in plasma,  $E_{max}$  is the maximum efficacy,  $n$  is the hill  
548 coefficient, and  $IC_{50}$  is the drug concentration in plasma required to provide 50%  
549 efficacy. We used least-squared fitting to obtain the three parameters and their standard  
550 deviations. The average drug efficacy is measured using,

$$551 \quad E_{ave} = \frac{1}{t_{start} - t_{end}} \int_{t_{start}}^{t_{end}} \epsilon(t) dt \quad (3)$$

552 Where  $t_{start}$  and  $t_{end}$  are the treatment start day and end day respectively.

553

### 554 **Combined PKPD and VL models**

555 The plasma concentration of nirmatrelvir obtained from the PK model is used in the PD  
556 model to obtain time-dependent efficacy.  $\epsilon(t)$ , then, is used to reduce viral production  
557 rate,  $\pi$ , with the factor of  $(1 - \epsilon(t))$ . Equation 1e is written as,

$$558 \quad \frac{dV}{dt} = (1 - \epsilon(t))\pi I_p - \gamma V \quad (4)$$

559

### 560 **Construction of a virtual cohort**

561 To generate a cohort for our simulated clinical trials, we randomly selected 400  
562 individuals (for each arm of the simulated trial) from the unvaccinated symptomatic  
563 subpopulation of the NBA cohort and used their individual viral load parameters  
564 estimated by fitting our viral dynamics model to the data. For their incubation period,  
565 we drew randomly from gamma distributions with parameters associated with their  
566 variants of concern (27). PK parameters of each simulated individual were randomly  
567 drawn from the lognormal distributions with their estimated mean and standard  
568 deviation inferred from PK data. The PD parameters were also randomly drawn from  
569 the normal distribution with the estimated mean and standard deviation. The standard  
570 deviation of the PD parameters represents the accuracy of the assays and not the  
571 individual variability. The individual potency reduction factors were also drawn from a  
572 normal distribution with mean and standard deviation obtained from fitting ten  
573 simulations to the treatment arm of trial 1.

### 574 **Potency reduction factor (prf)**

575 The potency reduction factor (prf) is defined as,

$$576 \quad prf = \frac{IC_{50, in vivo}}{IC_{50, in vitro}} \quad (5)$$

577

578 We estimated the prf by maximizing  $R^2$  when fitting the change in viral load of the  
579 treatment arm of our simulation to the data from the treatment arm of the clinical trial.

### 580 **Measuring rebound probability**

581 A viral load rebound in the treatment arm was defined when the viral load at any time  
582 after treatment ended exceeded the viral load at the end of the treatment by 1 log. In the  
583 control group, viral rebound was defined in patients who had at least two peaks with  
584 maximum height of 1000 copies/ml in their viral load trajectories and the second peak  
585 was 1log higher than its local minimum (**Fig S7**).

## 587 References

- 588
- 589 1. J. Hammond, H. Leister-Tebbe, A. Gardner, P. Abreu, W. Bao, W. Wisemandle, M. Baniecki, V. M. ,  
590 Hendrick, B. Damle, A. Simon-Campos, R. Pypstra, J. M. Rusnak, Oral Nirmatrelvir for High-Risk,  
591 Nonhospitalized Adults with Covid-19. *N Engl J Med* **386**, 1397–1408 (2022).
  - 592 2. Emergency Use Authorization for Paxlovid (nirmatrelvir tablets co-packaged with ritonavir tablets) Center for  
593 Drug Evaluation and Research (CDER) Review. *Food and Drug Administration* (2021) (available at  
594 <https://www.fda.gov/media/155194/download>).
  - 595 3. M. Khunte, S. Kumar, J. A. Salomon, A. Bilinski, Projected COVID-19 Mortality Reduction From Paxlovid  
596 Rollout. *JAMA Health Forum* **4**, E230046 (2023).
  - 597 4. FDA Approves First Oral Antiviral for Treatment of COVID-19 in Adults. *Food and Drug Administration*  
598 (available at [https://www.fda.gov/news-events/press-announcements/fda-approves-first-oral-antiviral-treatment-](https://www.fda.gov/news-events/press-announcements/fda-approves-first-oral-antiviral-treatment-covid-19-adults)  
599 [covid-19-adults](https://www.fda.gov/news-events/press-announcements/fda-approves-first-oral-antiviral-treatment-covid-19-adults)).
  - 600 5. W. H. K. Schilling, P. Jittamala, J. A. Watson, S. Boyd, V. Luvira, T. Siripoon, T. Ngamprasertchai, E. M.  
601 Batty, C. Cruz, J. J. Callery, S. Singh, M. Saroj, V. Kruabkontho, T. Ngernseng, N. Tanglakmankhong, J.  
602 Tubprasert, M. Y. Abdad, W. Madmanee, J. Kouhathong, K. Suwannasin, W. Pagornrat, N. Piaraksa, P.  
603 Hanboonkunupakarn, B. Hanboonkunupakarn, K. Poovorawan, M. Potaporn, A. Srisubat, B. Loharjun, W. R. J.  
604 Taylor, V. Chotivanich, K. Chotivanich, M. Imwong, S. Pukrittayakamee, A. M. Dondorp, N. P. J. Day, M. M.  
605 Teixeira, W. Piyaphanee, W. Phumratanaprapin, N. J. White, N. J. White, W. H. Schilling, W. Phumratanaprapin,  
606 V. Luvira, J. J. Callery, N. P. Day, S. Pukrittayakamee, S. Boyd, C. Cruz, A. M. Dondorp, W. R. Taylor, J. A.  
607 Watson, W. Piyaphanee, K. Poovorawan, T. Ngamprasertchai, T. Siripoon, B. Hanboonkunupakarn, K.  
608 Chotivanich, P. Jittamala, M. Imwong, J. Thaipadungpanit, M. Ekkapongpisit, V. Kruabkontho, T. Ngernseng, J.  
609 Tubprasert, M. Y. Abdad, E. M. Batty, S. Singh, V. Chotivanich, W. Ruksakul, C. Sangketchon, P.  
610 Hanboonkunupakarn, S. Sookprome, M. Teixeira, P. J. Almeida, R. S. Aguiar, F. Santos, E. Ashley, M.  
611 Vongsouvath, K. Phommason, A. Dubot-Pères, S. Vidhamaly, A. Chingsanoon, S. Bisayher, D. Chommanam, T.  
612 J. Evans, V. Vidhamaly, L. Boutthasavong, M. Mayxay, M. Potaporn, A. Srisubat, B. Loharjun, Antiviral efficacy  
613 of molnupiravir versus ritonavir-boosted nirmatrelvir in patients with early symptomatic COVID-19  
614 (PLATCOV): an open-label, phase 2, randomised, controlled, adaptive trial. *Lancet Infect Dis* **0** (2023),  
615 doi:10.1016/S1473-3099(23)00493-0.
  - 616 6. J. A. Pandit, J. M. Radin, D. C. Chiang, E. G. Spencer, J. B. Pawelek, M. Diwan, L. Roumani, M. J. Mina, The  
617 Coronavirus Disease 2019 Rebound Study: A Prospective Cohort Study to Evaluate Viral and Symptom Rebound  
618 Differences in Participants Treated With Nirmatrelvir Plus Ritonavir Versus Untreated Controls. *Clinical*  
619 *Infectious Diseases* **77**, 25–31 (2023).
  - 620 7. C. K. H. Wong, J. J. Lau, I. C. H. Au, K. T. K. Lau, I. F. N. Hung, M. Peiris, G. M. Leung, J. T. Wu, Optimal  
621 timing of nirmatrelvir/ritonavir treatment after COVID-19 symptom onset or diagnosis: target trial emulation. *Nat*  
622 *Commun* **14** (2023), doi:10.1038/s41467-023-43706-0.
  - 623 8. L. Wang, N. A. Berger, P. B. Davis, D. C. Kaelber, N. D. Volkow, R. Xu, COVID-19 rebound after Paxlovid  
624 and Molnupiravir during January-June 2022. *medRxiv* (2022), doi:10.1101/2022.06.21.22276724.
  - 625 9. A. S. Anderson, P. Caubel, J. M. Rusnak, Nirmatrelvir–Ritonavir and Viral Load Rebound in Covid-19. *New*  
626 *England Journal of Medicine* **387**, 1047–1049 (2022).
  - 627 10. Pfizer Shares Top-Line Results from Phase 2/3 EPIC-PEP Study of PAXLOVID™ for Post-Exposure  
628 Prophylactic Use. *Pfizer* (available at [https://www.pfizer.com/news/press-release/press-release-detail/pfizer-](https://www.pfizer.com/news/press-release/press-release-detail/pfizer-shares-top-line-results-phase-23-epic-pep-study)  
629 [shares-top-line-results-phase-23-epic-pep-study](https://www.pfizer.com/news/press-release/press-release-detail/pfizer-shares-top-line-results-phase-23-epic-pep-study)).
  - 630 11. Merck Provides Update on Phase 3 MOVE-AHEAD Trial Evaluating LAGEVRIO™ (molnupiravir) for Post-  
631 exposure Prophylaxis for Prevention of COVID-19 - Merck.com (available at  
632 [https://www.merck.com/news/merck-provides-update-on-phase-3-move-ahead-trial-evaluating-lagevr-io-](https://www.merck.com/news/merck-provides-update-on-phase-3-move-ahead-trial-evaluating-lagevr-io-molnupiravir-for-post-exposure-prophylaxis-for-prevention-of-covid-19/)  
633 [molnupiravir-for-post-exposure-prophylaxis-for-prevention-of-covid-19/](https://www.merck.com/news/merck-provides-update-on-phase-3-move-ahead-trial-evaluating-lagevr-io-molnupiravir-for-post-exposure-prophylaxis-for-prevention-of-covid-19/)).
  - 634 12. C. Hirsch, Y. S. Park, V. Piechotta, K. L. Chai, L. J. Estcourt, I. Monsef, S. Salomon, E. M. Wood, C. So-  
635 Osman, Z. McQuilten, C. D. Spinner, J. J. Malin, M. Stegemann, N. Skoetz, N. Kreuzberger, SARS-CoV-2-  
636 neutralising monoclonal antibodies to prevent COVID-19. *Cochrane Database Syst Rev*, Art. No.: CD014945  
637 (2022).
  - 638 13. M. P. O'Brien, E. Forleo-Neto, N. Sarkar, F. Isa, P. Hou, K. C. Chan, B. J. Musser, K. J. Bar, R. V. Barnabas,  
639 D. H. Barouch, M. S. Cohen, C. B. Hurt, D. R. Burwen, M. A. Marovich, E. R. Brown, I. Heirman, J. D. Davis, K.

- 640 C. Turner, D. Ramesh, A. Mahmood, A. T. Hooper, J. D. Hamilton, Y. Kim, L. A. Purcell, A. Baum, C. A.  
641 Kyratsous, J. Krainson, R. Perez-Perez, R. Mohseni, B. Kowal, A. T. Dicioccio, G. P. Geba, N. Stahl, L. Lipsich,  
642 N. Braunstein, G. Herman, G. D. Yancopoulos, D. M. Weinreich, Effect of Subcutaneous Casirivimab and  
643 Imdevimab Antibody Combination vs Placebo on Development of Symptomatic COVID-19 in Early  
644 Asymptomatic SARS-CoV-2 Infection: A Randomized Clinical Trial. *JAMA* **327**, 432–441 (2022).
- 645 14. M. P. O'Brien, E. Forleo-Neto, B. J. Musser, F. Isa, K.-C. Chan, N. Sarkar, K. J. Bar, R. V. Barnabas, D. H.  
646 Barouch, M. S. Cohen, C. B. Hurt, D. R. Burwen, M. A. Marovich, P. Hou, I. Heirman, J. D. Davis, K. C. Turner,  
647 D. Ramesh, A. Mahmood, A. T. Hooper, J. D. Hamilton, Y. Kim, L. A. Purcell, A. Baum, C. A. Kyratsous, J.  
648 Krainson, R. Perez-Perez, R. Mohseni, B. Kowal, A. T. DiCioccio, N. Stahl, L. Lipsich, N. Braunstein, G.  
649 Herman, G. D. Yancopoulos, D. M. Weinreich, Subcutaneous REGEN-COV Antibody Combination to Prevent  
650 Covid-19. *N Engl J Med* **385**, 1184–1195 (2021).
- 651 15. G. A. Herman, M. P. O'Brien, E. Forleo-Neto, N. Sarkar, F. Isa, P. Hou, K. C. Chan, K. J. Bar, R. V.  
652 Barnabas, D. H. Barouch, M. S. Cohen, C. B. Hurt, D. R. Burwen, M. A. Marovich, B. J. Musser, J. D. Davis, K.  
653 C. Turner, A. Mahmood, A. T. Hooper, J. D. Hamilton, J. Parrino, D. Subramaniam, A. Baum, C. A. Kyratsous,  
654 A. T. DiCioccio, N. Stahl, N. Braunstein, G. D. Yancopoulos, D. M. Weinreich, A. Chani, A. Adepoju, A.  
655 Mortagy, A. Dupljak, A. Brown, A. Froment, A. Hooper, A. Margiotta, A. Bombardier, A. Islam, A. Smith, A.  
656 Dhillon, A. McMillian, A. Breazna, A. Aslam, B. Carpentino, B. Kowal, B. Siliverstein, B. Horel, B. Zhu, B.  
657 Musser, B. Bush, B. Head, B. Snow, B. Zhu, C. Debray, C. Phillips, C. Simiele, C. Lee, C. Nienstedt, C. Trbovic,  
658 C. (Kuo C. Chan, C. Elliott, C. Fish, C. Ni, C. Polidori, C. Enciso, C. Caira, C. Powell, C. A. Kyratsous, C. Baum,  
659 C. McDonald, C. Leigh, C. Pan, D. Wolken, D. Manganello, D. Liu, D. Stein, D. M. Weinreich, D. Hassan, D.  
660 Gulabani, D. Fix, D. Leonard, D. Sarda, D. Bonhomme, D. Kennedy, D. Darcy, D. Barron, D. Hughes, D. Rofail,  
661 D. Kaur, D. Ramesh, D. Bianco, D. Cohen, E. Jean-Baptiste, E. Bukhari, E. Doyle, E. Bucknam, E. Labriola-  
662 Tomkins, E. Nanna, E. Huffman O'Keefe, E. Gasparino, E. Fung, F. Y. To, G. Herman, G. D. Yancopoulos, G.  
663 Bellingham, G. Sumner, G. Moggan, G. Power, H. Zeng, H. Mariveles, H. Gonzalez, H. Kang, H. Noor, I. Minns,  
664 I. Heirman, I. Peszek, J. Donohue, J. Rusconi, J. Austin, J. Yo, J. McDonnell, J. D. Hamilton, J. Boarder, J. Wei,  
665 J. Yu, J. Malia, J. Tucciarone, J. Tyler-Gale, J. D. Davis, J. Strein, J. Cohen, J. Meyer, J. Ursino, J. Im, J.  
666 Tramaglino, J. Wolken, K. Potter, K. Scacalossi, K. Naidu, K. Browning, K. Rutkowski, K. Yau, K. Woloshin, K.  
667 Lewis-Amezcu, K. Turner, K. Dornheim, K. Chiu, K. Mohan, K. McGuire, K. Macci, K. Ringleben, K.  
668 Mohammadi, K. Foster, L. Knighton, L. Lipsich, L. Darling, L. Boersma, L. Cowen, L. Hersh, L. Jackson, L.  
669 Purcell, L. Sherpinsky, L. Lai, L. Faria, L. Geissler, L. Boppert, L. Fiske, M. Dickens, M. Mancini, M. C. Leigh,  
670 M. P. O'Brien, M. Batchelder, M. Klinger, M. Partridge, M. Tarabocchia, M. Wong, M. Rodriguez, M. Albizem,  
671 M. O'Byrne, N. Deitz, N. Memblatt, N. Shah, N. Kumar, O. Herrera, O. Adedoyin, O. Yellin, P. Snodgrass, P.  
672 Floody, P. D' Ambrosio, P. (Xiaobang) Gao, P. Hearld, Q. Li, R. Kitchenoff, R. Ali, R. Iyer, R. Chava, R. Alaj, R.  
673 Pedraza, R. Hamlin, R. Hosain, R. Gorawala, R. White, R. Yu, R. Fogarty, S. B. Dass, S. Bollini, S. Ganguly, S.  
674 DeCicco, S. Patel, S. Cassimaty, S. Somersan-Karakaya, S. McCarthy, S. Henkel, S. Ali, S. Geila Shapiro, S.  
675 Kim, S. Nossoughi, S. Bisulco, S. Elkin, S. Long, S. Sivapalasingam, S. Irvin, S. Wilt, T. Min, T. Constant, T.  
676 Devins, T. DiCioccio, T. Norton, T. Bernardo, T. C. Chuang, V. (Jianguo) Wei, V. Nuce, V. Battini, W. Caldwell,  
677 X. Gao, X. Chen, Y. Tian, Y. Khan, Y. Zhao, Y. Kim, B. Dye, C. B. Hurt, D. R. Burwen, D. Burns, E. Brown, K.  
678 J. Bar, M. Marovich, M. Clement, M. S. Cohen, N. Sista, R. V. Barnabas, S. Zwierski, Efficacy and safety of a  
679 single dose of casirivimab and imdevimab for the prevention of COVID-19 over an 8-month period: a  
680 randomised, double-blind, placebo-controlled trial. *Lancet Infect Dis* **22**, 1444–1454 (2022).
- 681 16. K. Su, K. Ejima, Shoya Iwanami, Y. Fujita, H. Ohashi, Y. Koizumi, Y. Asai, S. Nakaoka, K. Watashi, K.  
682 Aihara, R. N. Thompson Id, R. Ke, A. S. Perelson, Shingo Iwami, A quantitative model used to compare within-  
683 host SARS-CoV-2, MERS-CoV, and SARS-CoV dynamics provides insights into the pathogenesis and treatment  
684 of SARS-CoV-2. *PLoS Biol* **19**, e3001128 (2021).
- 685 17. S. Wang, Y. Pan, Q. Wang, H. Miao, A. N. Brown, L. Rong, Modeling the viral dynamics of SARS-CoV-2  
686 infection. *Math Biosci* **328**, 108438 (2020).
- 687 18. A. S. Perelson, R. Ke, Mechanistic Modeling of SARS-CoV-2 and Other Infectious Diseases and the Effects  
688 of Therapeutics. *Clin Pharmacol Ther* **109**, 829–840 (2021).
- 689 19. S. Sanche, T. Cassidy, P. Chu, A. S. Perelson, R. M. Ribeiro, R. Ke, A simple model of COVID-19 explains  
690 disease severity and the effect of treatments. *Sci Rep* **12**, 14210 (2022).
- 691 20. P. Czuppon, F. Débarre, A. Gonçalves, O. Tenaillon, A. S. Perelson, J. Guedj, F. Blanquart, Success of  
692 prophylactic antiviral therapy for SARS-CoV-2: Predicted critical efficacies and impact of different drug-specific  
693 mechanisms of action. *PLoS Comput Biol* **17**, e1008752 (2021).
- 694 21. A. Gonçalves, J. Bertrand, R. Ke, E. Comets, X. de Lamballerie, D. Malvy, A. Pizzorno, O. Terrier, M. Rosa  
695 Calatrava, F. Mentré, P. Smith, A. S. Perelson, J. Guedj, Timing of Antiviral Treatment Initiation is Critical to  
696 Reduce SARS-CoV-2 Viral Load. *CPT Pharmacometrics Syst Pharmacol* **9**, 509–514 (2020).
- 697 22. S. Iwanami, K. Ejima, K. Su Kim, K. Noshita, Y. Fujita, T. Miyazaki, S. Kohno, Y. Miyazaki, S. Morimoto,  
698 S. Nakaoka, Y. Koizumi, Y. Asai, K. Aihara, K. Watashi, R. N. Thompson, K. Shibuya, K. Fujiu, A. S. Perelson,  
699 S. Iwami, T. Wakita, Detection of significant antiviral drug effects on COVID-19 with reasonable sample sizes in  
700 randomized controlled trials: A modeling study. *PLoS Med* **18**, 25 (2021).

- 701 23. A. Goyal, E. F. Cardozo-Ojeda, J. T. Schiffer, Potency and timing of antiviral therapy as determinants of  
702 duration of SARS-CoV-2 shedding and intensity of inflammatory response. *Sci Adv* **6** (2020),  
703 doi:10.1126/sciadv.abc7112.
- 704 24. V. Fumagalli, P. Di Lucia, M. Ravà, D. Marotta, E. Bono, S. Grassi, L. Donnici, R. Cannalire, I. Stefanelli, A.  
705 Ferraro, F. Esposito, E. Pariani, D. Inverso, C. Montesano, S. Delbue, S. Perlman, E. Tramontano, R. De  
706 Francesco, V. Summa, L. G. Guidotti, M. Iannacone, Nirmatrelvir treatment of SARS-CoV-2-infected mice blunts  
707 antiviral adaptive immune responses. *EMBO Mol Med* **15**, e17580 (2023).
- 708 25. A. S. Perelson, R. M. Ribeiro, T. Phan, An explanation for SARS-CoV-2 rebound after Paxlovid treatment.  
709 *medRxiv* (2023), doi:10.1101/2023.05.30.23290747.
- 710 26. K. Owens, S. Esmaili-Wellman, J. T. Schiffer, Heterogeneous SARS-CoV-2 kinetics due to variable timing  
711 and intensity of immune responses. *medRxiv* (2023), doi:10.1101/2023.08.20.23294350.
- 712 27. S. Galmiche, T. Cortier, T. Charmet, L. Schaeffer, O. Chény, C. Von Platen, A. Lévy, S. Martin, F. Omar, C.  
713 David, A. Mailles, F. Carrat, S. Cauchemez, A. Fontanet, SARS-CoV-2 incubation period across variants of  
714 concern, individual factors, and circumstances of infection in France: a case series analysis from the ComCor  
715 study. *Lancet Microbe* **4**, E409–E417 (2023).
- 716 28. C. L. Finch, J. Dyllal, S. Xu, E. A. Nelson, E. Postnikova, J. Y. Liang, H. Zhou, L. E. DeWald, C. J. Thomas,  
717 A. Wang, X. Xu, E. Hughes, P. J. Morris, J. C. Mirsalis, L. H. Nguyen, M. P. Arolfo, B. Koci, M. R. Holbrook, L.  
718 E. Hensley, P. B. Jahrling, C. Schmaljohn, L. M. Johansen, G. G. Olinger, J. T. Schiffer, J. M. White,  
719 Formulation, Stability, Pharmacokinetic, and Modeling Studies for Tests of Synergistic Combinations of Orally  
720 Available Approved Drugs against Ebola Virus In Vivo. *Microorganisms* **9**, 566 (2021).
- 721 29. B. T. Mayer, A. C. deCamp, Y. Huang, J. T. Schiffer, R. Gottardo, P. B. Gilbert, D. B. Reeves, Optimizing  
722 clinical dosing of combination broadly neutralizing antibodies for HIV prevention. *PLoS Comput Biol* **18** (2022),  
723 doi:10.1371/JOURNAL.PCBI.1010003.
- 724 30. A. S. Anderson, P. Caubel, J. M. Rusnak, Nirmatrelvir–Ritonavir and Viral Load Rebound in Covid-19. *New*  
725 *England Journal of Medicine* **387**, 1047–1049 (2022).
- 726 31. G. E. Edelstein, J. Boucau, R. B. Uddin, C. B. Marino, M. Y. Liew BA, M. Barry, M. C. Choudhary, R. F.  
727 Gilbert, Z. Reynolds MPH, Y. Li, D. Tien BSA, S. B. Sagar, T. D. Vyas BS, Y. Kawano, J. A. Sparks MMsc, Z.  
728 Wallace, J. M. Vyas, J. E. Lemieux, J. Z. Li, M. J. Siedner, SARS-CoV-2 virologic rebound with nirmatrelvir-  
729 ritonavir therapy. , doi:10.1101/2023.06.23.23288598.
- 730 32. J. T. Schiffer, D. A. Swan, L. Corey, A. Wald, Rapid viral expansion and short drug half-life explain the  
731 incomplete effectiveness of current herpes simplex virus 2-directed antiviral agents. *Antimicrob Agents*  
732 *Chemother* **57**, 5820–5829 (2013).
- 733 33. D. B. Reeves, Y. Huang, E. R. Duke, B. T. Mayer, E. Fabian Cardozo-Ojeda, F. A. Boshier, D. A. Swan, M.  
734 Rolland, M. L. Robb, J. R. Mascola, M. S. Cohen, L. Corey, P. B. Gilbert, J. T. Schiffer, Mathematical modeling  
735 to reveal breakthrough mechanisms in the HIV Antibody Mediated Prevention (AMP) trials. *PLoS Comput Biol*  
736 **16** (2020), doi:10.1371/JOURNAL.PCBI.1007626.
- 737 34. J. T. Schiffer, D. A. Swan, A. Magaret, L. Corey, A. Wald, J. Ossid, H. Ruebsamen-Schaeff, S. Stoelben, B.  
738 Timmler, H. Zimmermann, M. R. Melhem, S. A. Van Wart, C. M. Rubino, A. Birkmann, Mathematical modeling  
739 of herpes simplex virus-2 suppression with pritelivir predicts trial outcomes. *Sci Transl Med* **8** (2016),  
740 doi:10.1126/SCITRANSLMED.AAD6654/SUPPL\_FILE/AAD6654\_VIDEO\_S4.MOV.
- 741 35. S. R. Greenfield, H. Eng, Q. Yang, C. Guo, L. Byrnes, A. Dantonio, G. West, L. Di, A. S. Kalgutkar, Species  
742 differences in plasma protein binding of the severe acute respiratory syndrome coronavirus 2 (SARS-CoV-2) main  
743 protease inhibitor nirmatrelvir. *Xenobiotica* **53**, 12–24 (2023).
- 744 36. R. K. Hau, S. H. Wright, N. J. Cherrington, PF-07321332 (Nirmatrelvir) does not interact with human ENT1  
745 or ENT2: Implications for COVID-19 patients. *Clin Transl Sci* **15**, 1599–1605 (2022).
- 746 37. G. E. Edelstein, J. Boucau, R. Uddin, C. Marino, M. Y. Liew, M. Barry, M. C. Choudhary, R. F. Gilbert, Z.  
747 Reynolds, Y. Li, D. Tien, S. Sagar, T. D. Vyas, Y. Kawano, J. A. Sparks, S. P. Hammond, Z. Wallace, J. M. Vyas,  
748 A. K. Barczak, J. E. Lemieux, J. Z. Li, M. J. Siedner, SARS-CoV-2 virologic rebound with nirmatrelvir-ritonavir  
749 therapy. *medRxiv* , 2023.06.23.23288598 (2023).
- 750 38. C. K. H. Wong, K. T. K. Lau, I. C. H. Au, E. H. Y. Lau, L. L. M. Poon, I. F. N. Hung, B. J. Cowling, G. M.  
751 Leung, Viral burden rebound in hospitalised patients with COVID-19 receiving oral antivirals in Hong Kong: a  
752 population-wide retrospective cohort study. *Lancet Infect Dis* **23**, 683–695 (2023).
- 753 39. J. A. Pandit, J. M. Radin, D. C. Chiang, E. G. Spencer, J. B. Pawelek, M. Diwan, L. Roumani, M. J. Mina,  
754 The Coronavirus Disease 2019 Rebound Study: A Prospective Cohort Study to Evaluate Viral and Symptom  
755 Rebound Differences in Participants Treated With Nirmatrelvir Plus Ritonavir Versus Untreated Controls. *Clin*  
756 *Infect Dis* **77** (2023), doi:10.1093/CID/CIAD102.
- 757 40. N. S. Zuckerman, E. Bucris, D. Keidar-Friedman, M. Amsalem, T. Brosh-Nissimov, Nirmatrelvir resistance-  
758 de novo E166V/L50V mutations in an immunocompromised patient treated with prolonged nirmatrelvir/ritonavir  
759 monotherapy leading to clinical and virological treatment failure—a case report. , doi:10.1093/cid/ciad494.
- 760 41. A. Jayk Bernal, M. M. Gomes da Silva, D. B. Musungaie, E. Kovalchuk, A. Gonzalez, V. Delos Reyes, A.  
761 Martín-Quirós, Y. Caraco, A. Williams-Diaz, M. L. Brown, J. Du, A. Pedley, C. Assaid, J. Strizki, J. A. Grobler,



762 H. H. Shamsuddin, R. Tipping, H. Wan, A. Paschke, J. R. Butterson, M. G. Johnson, C. De Anda, Molnupiravir  
763 for Oral Treatment of Covid-19 in Nonhospitalized Patients. *New England Journal of Medicine* **386**, 509–520  
764 (2022).

765 42. K. M. Elias, S. R. Khan, E. Stadler, T. E. Schlub, D. Cromer, M. N. Polizzotto, S. J. Kent, T. Turner, M. P.  
766 Davenport, D. S. Houry, Viral clearance as a surrogate of clinical efficacy for COVID-19 therapies in  
767 outpatients: A systematic review and meta-analysis. *medRxiv*, 2023.06.18.23291566 (2023).

768 43. R. L. Gottlieb, C. E. Vaca, R. Paredes, J. Mera, B. J. Webb, G. Perez, G. Oguchi, P. Ryan, B. U. Nielsen, M.  
769 Brown, A. Hidalgo, Y. Sachdeva, S. Mittal, O. Osiyemi, J. Skarbinski, K. Juneja, R. H. Hyland, A. Osinusi, S.  
770 Chen, G. Camus, M. Abdelghany, S. Davies, N. Behenna-Renton, F. Duff, F. M. Marty, M. J. Katz, A. A. Ginde,  
771 S. M. Brown, J. T. Schiffer, J. A. Hill, Early Remdesivir to Prevent Progression to Severe Covid-19 in  
772 Outpatients. *New England Journal of Medicine* **386**, 305–315 (2022).

773 44. A. F. Carlin, A. E. Clark, A. Chaillon, A. F. Garretson, W. Bray, M. Porrachia, A. L. T. Santos, T. M. Rana,  
774 D. M. Smith, Virologic and Immunologic Characterization of Coronavirus Disease 2019 Recrudescence After  
775 Nirmatrelvir/Ritonavir Treatment. *Clin Infect Dis* **76**, E530–E532 (2023).

776 45. B. P. Epling, J. M. Rocco, K. L. Boswell, E. Laidlaw, F. Galindo, A. Kellogg, S. Das, A. Roder, E. Ghedin, A.  
777 Kreitman, R. L. Dewar, S. E. M. Kelly, H. Kalish, T. Rehman, J. Highbarger, A. Rupert, G. Kocher, M. R.  
778 Holbrook, A. Lisco, M. Manion, R. A. Koup, I. Sereti, Clinical, Virologic, and Immunologic Evaluation of  
779 Symptomatic Coronavirus Disease 2019 Rebound Following Nirmatrelvir/Ritonavir Treatment. *Clin Infect Dis*  
780 **76**, 573–581 (2023).

781 46. J. Boucau, R. Uddin, C. Marino, J. Regan, J. P. Flynn, M. C. Choudhary, G. Chen, A. M. Stuckwisch, J.  
782 Mathews, M. Y. Liew, A. Singh, Z. Reynolds, S. L. Iyer, G. C. Chamberlin, T. D. Vyas, J. M. Vyas, S. E. Turbett,  
783 J. Z. Li, J. E. Lemieux, A. K. Barczak, M. J. Siedner, Characterization of Virologic Rebound Following  
784 Nirmatrelvir-Ritonavir Treatment for Coronavirus Disease 2019 (COVID-19). *Clin Infect Dis* **76**, E526–E529  
785 (2023).

786 47. C. C. Lai, P. R. Hsueh, Coronavirus disease 2019 rebounds following nirmatrelvir/ritonavir treatment. *J Med*  
787 *Virol* **95** (2023), doi:10.1002/JMV.28430.

788 48. J. A. Hay, S. M. Kissler, J. R. Fauver, C. Mack, C. G. Tai, R. M. Samant, S. Connolly, D. J. Anderson, G.  
789 Khullar, M. Mackay, M. Patel, S. Kelly, A. Manhertz, I. Eiter, D. Salgado, T. Baker, B. Howard, J. T. Dudley, C.  
790 E. Mason, M. Nair, Y. Huang, J. Difiori, D. D. Ho, N. D. Grubaugh, Y. H. Grad, Quantifying the impact of  
791 immune history and variant on SARS-CoV-2 viral kinetics and infection rebound: A retrospective cohort study.  
792 *Elife* **11** (2022), doi:10.7554/eLife.81849.

793 49. R. S. P. Singh, S. S. Toussi, F. Hackman, P. L. Chan, R. Rao, R. Allen, L. Van Eyck, S. Pawlak, E. P. Kadar,  
794 F. Clark, H. Shi, A. S. Anderson, M. Binks, S. Menon, G. Nucci, A. Bergman, Innovative Randomized Phase I  
795 Study and Dosing Regimen Selection to Accelerate and Inform Pivotal COVID-19 Trial of Nirmatrelvir. *Clin*  
796 *Pharmacol Ther* **112**, 101–111 (2022).

797 50. D. R. Owen, C. M. N. Allerton, A. S. Anderson, L. Aschenbrenner, M. Avery, S. Berritt, B. Boras, R. D.  
798 Cardin, A. Carlo, K. J. Coffman, A. Dantonio, L. Di, H. Eng, R. A. Ferre, K. S. Gajiwala, S. A. Gibson, S. E.  
799 Greasley, B. L. Hurst, E. P. Kadar, A. S. Kalgutkar, J. C. Lee, J. Lee, W. Liu, S. W. Mason, S. Noell, J. J. Novak,  
800 R. S. Obach, K. Ogilvie, N. C. Patel, M. Pettersson, D. K. Rai, M. R. Reese, M. F. Sammons, J. G. Sathish, R. S.  
801 P. Singh, C. M. Steppan, A. E. Stewart, J. B. Tuttle, L. Updyke, P. R. Verhoest, L. Wei, Q. Yang, Y. Zhu, An oral  
802 SARS-CoV-2 Mpro inhibitor clinical candidate for the treatment of COVID-19. *Science* **374**, 1586–1593 (2021).

803 51. J. Wagoner, S. Herring, T.-Y. Hsiang, A. Ianevski, S. B. Biering, S. Xu, M. Hoffmann, S. Pöhlmann, M. Gale,  
804 T. Aittokallio, J. T. Schiffer, J. M. White, S. J. Polyak, Combinations of Host- and Virus-Targeting Antiviral  
805 Drugs Confer Synergistic Suppression of SARS-CoV-2. *Microbiol Spectr* **10** (2022),  
806 doi:10.1128/SPECTRUM.03331-22.

807  
808  
809  
810  
811  
812  
813  
814  
815  
816  
817  
818  
819

820 **Acknowledgments**

821

822 **Funding:**

823 National Institutes of Health (NIH) grants R01AI169427 (JTS)

824 National Institutes of Health (NIH) grants R01AI121129 (JTS)

825 National Institutes of Health (NIH) grants R01AI177512 (JTS, SJP)

826

827 **Author contributions:**

828 Conceptualization: JTS, SE, KO

829 Methodology: JTS, SE, KO

830 Software: SE, KO

831 Investigation: SJP, JW, SE, KO

832 Formal analysis: SE, KO

833 Writing – original draft: JTS, SE

834 Writing – review & editing: JTS, SE, KO, SJP, JW, JMW

835

836 **Competing interests:**

837 Authors declare that they have no competing interests.

838

839 **Data and materials availability:**

840 All code, and materials used in the analysis is available on github at

841 [https://github.com/sEsmaeili/Covid\\_Rebound](https://github.com/sEsmaeili/Covid_Rebound)

842 The data analyzed in this work was previously published by Hay et al. and Schilling et

843 al. and is available on github at [https://github.com/gradlab/SC2-kinetics-immune-](https://github.com/gradlab/SC2-kinetics-immune-history)

844 [history](https://github.com/jwatowatson/PLATCOV-Molnupiravir/tree/V1.0) and <https://github.com/jwatowatson/PLATCOV-Molnupiravir/tree/V1.0>

845

846

847

848 **Figures and Tables**

849

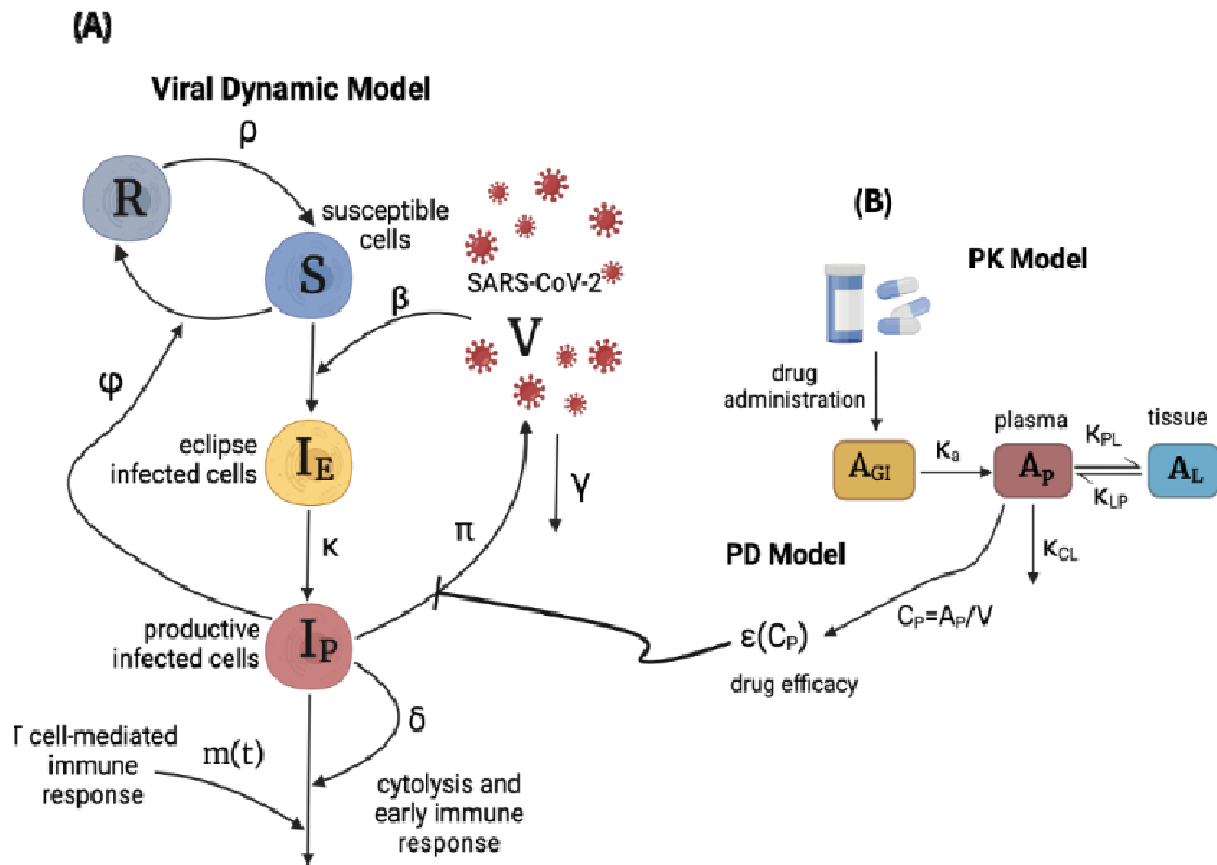

850

851

852

853

854

855

856

857

858

859

860

861

862

863

864

865

866

867

**Fig. 1. Schematics of the viral dynamic model and nirmatrelvir PK-PD two**

**compartmental model. (A)** The viral dynamic model follows the dynamics of susceptible cells (S), refractory cells (R), eclipse infected cells ( $I_E$ ), productively infected cells ( $I_P$ ), and virus (V) and includes the early and late cytolitic T-cell immune responses with rates  $\gamma$  and  $m(t)$ .  $\rho$  is the infection rate,  $\phi$  is the rate of reversion of refractory cells to susceptible cells. Infected cells produce viruses at the rate  $\beta$ , and the free viruses are cleared at the rate  $\gamma$ . **(B)** Two-compartmental PK model with oral administration of the drug which models the amounts of the drug in gut tissue ( $A_{GI}$ ), plasma ( $A_P$ ), and the tissue ( $A_L$ ).  $K_a$  is the rate of absorption of the drug from gut to plasma.  $K_{PL}$  and  $K_{LP}$  are the rates of transfer of the drug from plasma to the tissue and back, and  $K_{CL}$  is the rate at which the drug clears from the body.  $V$  is the estimated plasma volume and  $C_P$  is the drug concentration in plasma.  $\epsilon(C_P)$  is the drug efficacy that blocks viral production and is calculated using the Hill equation: \_\_\_\_\_

where  $E_{max}$  is the maximum efficacy,  $n$  is the Hill coefficient,  $IC_{50}$  is the concentration of drug *in vitro* at which viral replication rate is reduced by 50%,  $prf$  is the potency reduction factor translating the *in vitro* potency to *in vivo* potency.

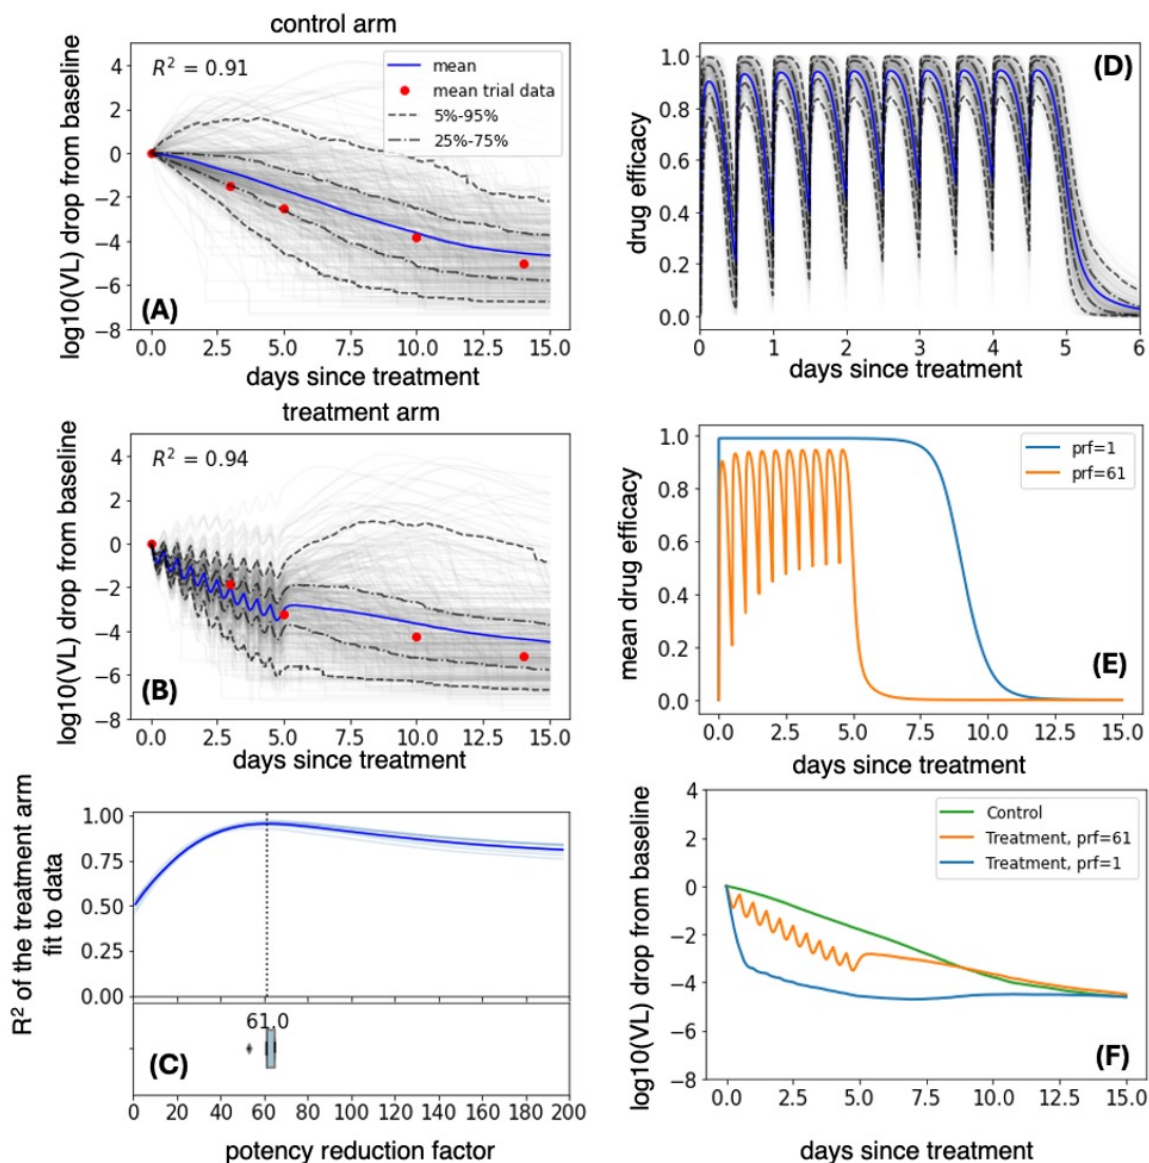

868  
 869 **Fig. 2. Lower *in vivo* potency of nirmatrelvir relative to *in vitro* potency in EPIC-**  
 870 **HR. (A-B)** mean (blue), individual (gray), and ranges (labeled dashed lines) of  
 871  $\log_{10}$  viral load drop from the baseline of individuals randomly selected from  
 872 the NBA cohort treated with (A) placebo or (B) five days of nirmatrelvir /  
 873 ritonavir 300 mg twice daily. The red dots were obtained by digitizing Fig 3a of  
 874 Hammond et al.(1) and model fit was noted by closeness of blue lines to the red  
 875 dots. (C)  $R^2$  of the fit of the 10 model simulations per prf to the viral load drop  
 876 data in light blue and their mean in dark blue. The best model fit was at a  
 877 potency reduction factor of 61. The horizontal boxplot in the lower panel shows  
 878 the distribution of prf values at which  $R^2$  is maximum (mean = 61.8, median  
 879 =61, sd=3.5). (D) Drug efficacy when prf=61. Average efficacy was 82% over  
 880 the 5-day interval, with notable drops in antiviral efficacy at drug troughs. (E)  
 881 Average drug efficacy when prf = 1 vs prf = 61. The drug with no potency  
 882 reduction has nearly perfect efficacy (average efficacy of 99.99%) over 5 days  
 883 and has a prolonged post-treatment effect. (F) mean  $\log_{10}$  viral load drop from  
 884 baseline of the control arm, treatment arm with prf=61, and treatment arm with  
 885 prf=1.  
 886

887

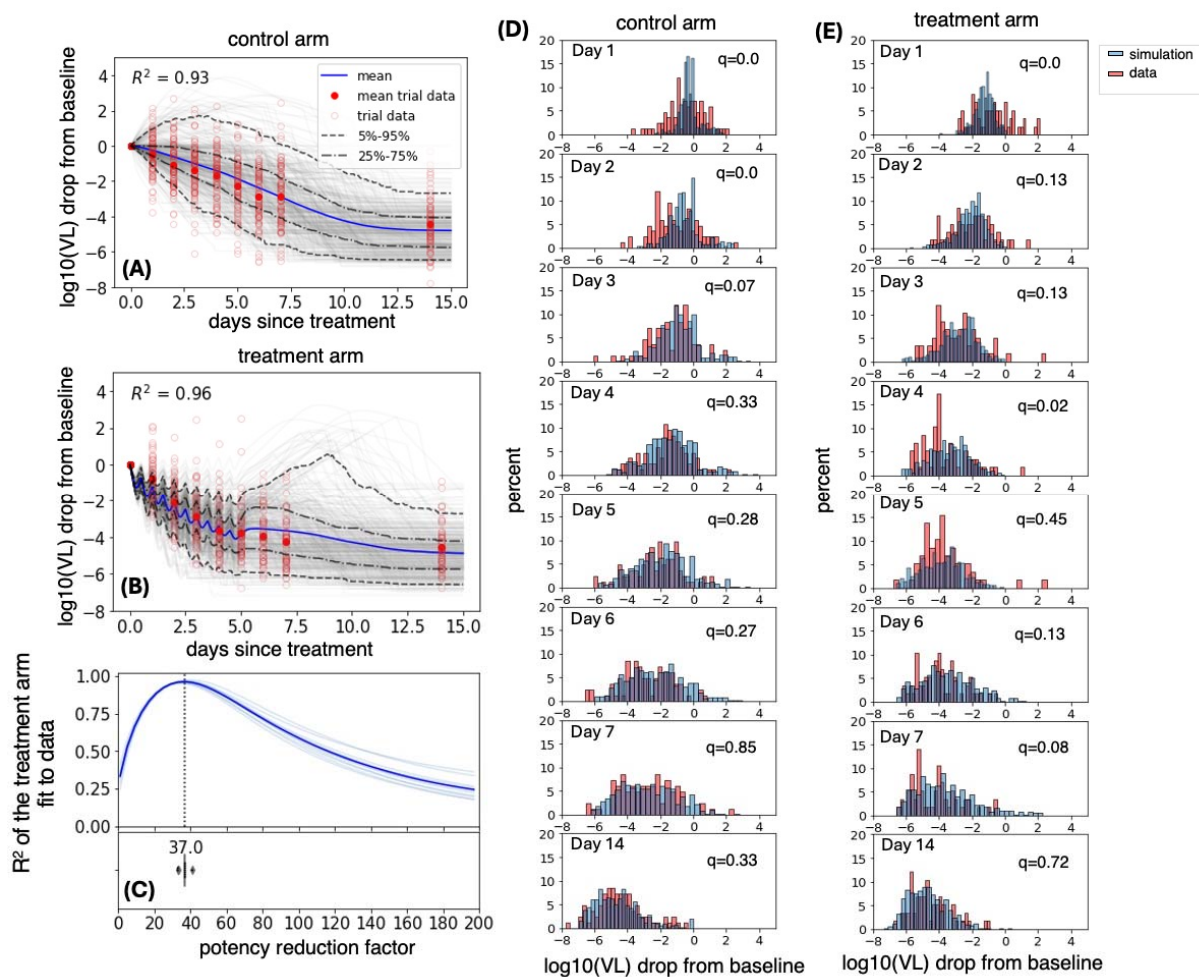

888

889

890

891

892

893

894

895

896

897

898

899

900

901

902

903

904

905

906

**Fig. 3. Lower *in vivo* potency of nirmatrelvir relative to *in vitro* potency in PLATCOV.** (A-B) mean (blue), individual (gray), and ranges (labeled dashed lines) of log<sub>10</sub> viral load drop from the baseline of individuals randomly selected from the NBA cohort treated with (A) placebo or (B) five days of nirmatrelvir / ritonavir 300 mg twice daily. The empty and filled red circles are individual and mean viral load drop from baseline calculated from viral load data published by Schilling et al.(5). Model fit was noted by closeness of blue lines to the filled red dots. (C) R<sup>2</sup> of the fit of the 10 model simulations per prf to the viral load drop data in light blue and their mean in dark blue. The best model fit was at a potency reduction factor of 37. The horizontal boxplot in the lower panel shows the distribution of prf values at which R<sup>2</sup> is maximum (mean = 36.6, median =37, sd=2.15). (D-E) distribution of log<sub>10</sub> viral load drop from baseline of simulated cohort and the 144 individuals in PLATCOV control arm (D) and treatment arm (E). Adjusted p-values (q-values) were calculated using Benjamini-Hochberg method and represent dissimilarity between observed and simulated distributions.

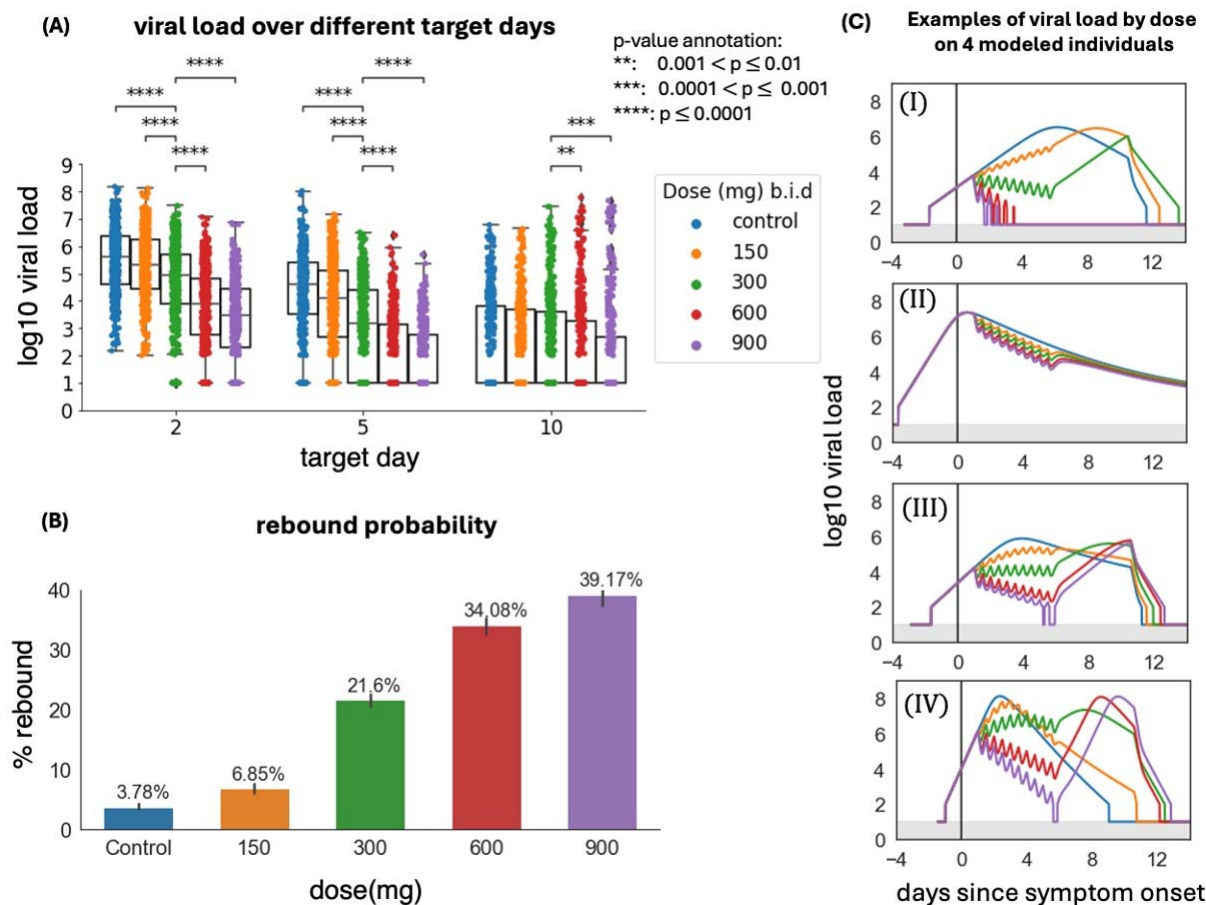

907  
 908  
 909  
 910  
 911  
 912  
 913  
 914  
 915  
 916  
 917  
 918  
 919  
 920

**Fig. 4. Increasing nirmatrelvir dose lowers short term viral load but increases probability of viral rebound.** In all scenarios, simulated treatment starts within the first 3 days post-symptoms. **(A)** log<sub>10</sub> viral load at days 2, 5, and 10 after the treatment start day with different doses. p-values were obtained by performing Mann-Whitney U-test between the 300 mg group and the others, and only p-values <math>< 0.01</math> are shown. Viral loads were only reduced by higher doses at days 2 and 5, but not day 10. **(B)** The probability of rebound for different doses. The error bars on each column are 95% confidence intervals. **(C)** Examples of viral load trajectories assuming different doses on 4 modeled individuals with equivalent timing of therapy and untreated viral kinetics.

921

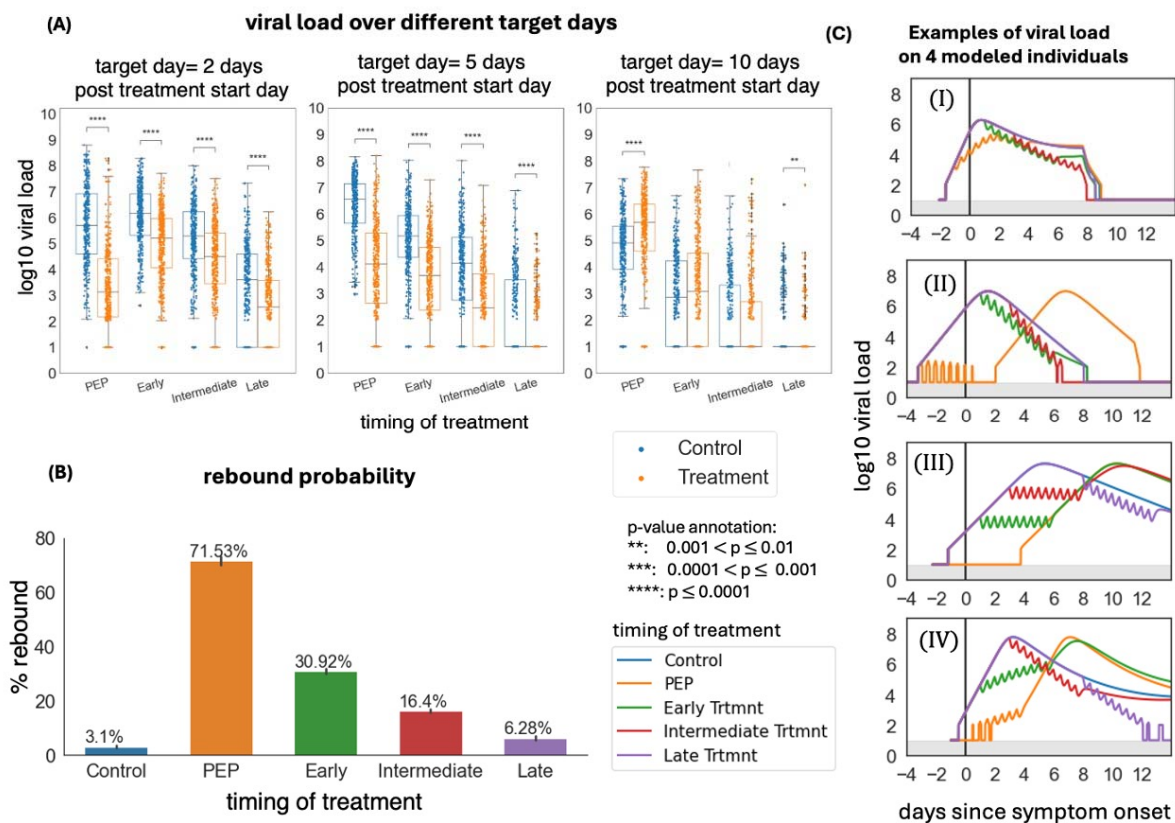

922

923

924

925

926

927

928

929

930

931

932

933

934

**Fig. 5. Early timing of therapy initiation is a key risk factor for viral rebound.** In all simulations, the dose was 300 mg twice daily for five days. **(A)** log<sub>10</sub> viral load at days 2, 5, and 10 after the treatment start day with different treatment durations. p-values were obtained by performing Mann-Whitney U-test. At day 10, the treatment group had higher viral loads compared to placebo due to viral rebound in the PEP and early treatment simulations, despite lowering viral loads significantly at days 2 and 5. **(B)** The probability of rebound for different treatment timing. The error bars on each column are 95% confidence interval **(C)** Samples of viral load trajectories assuming different treatment timing on 4 modeled individuals with equivalent untreated viral kinetics.

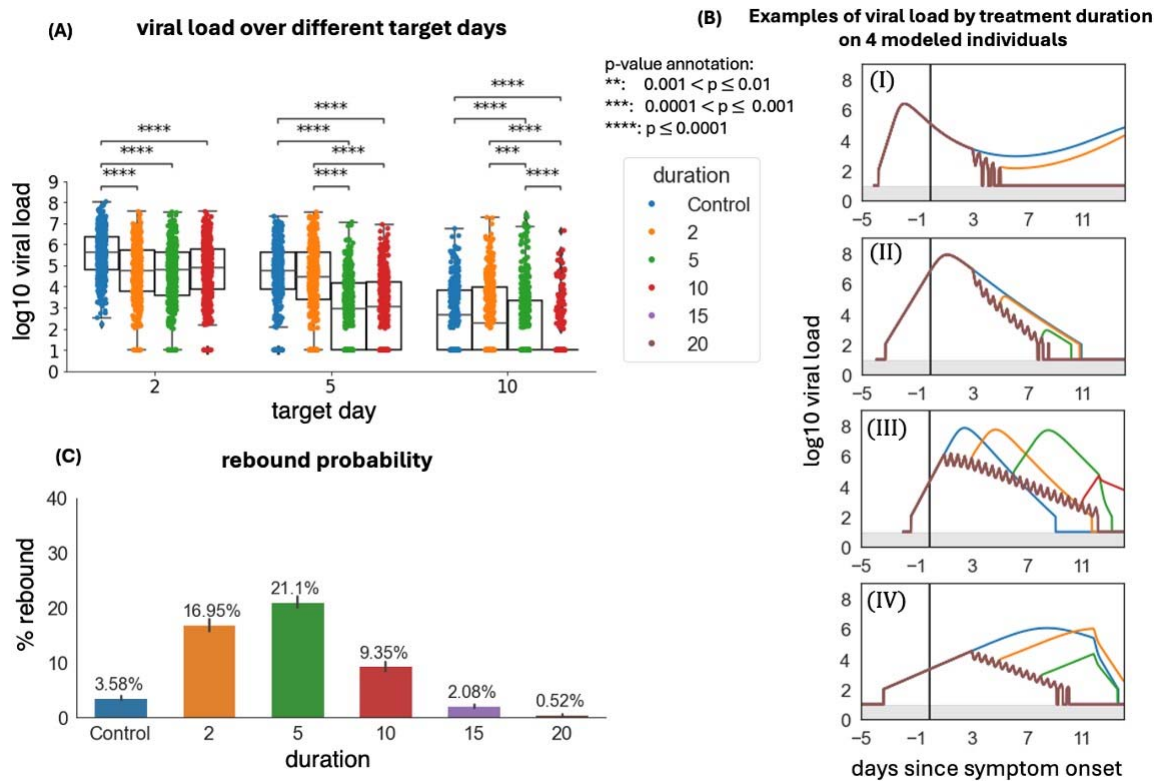

**Fig. 6. Prolonging treatment duration limits rebound probability.** In all simulations, treatment starts within the first 3 days post-symptoms and the dose was 300 mg twice daily. **(A)** log<sub>10</sub> viral load at days 2, 5, and 10 after the treatment start day with different treatment durations. p-values were obtained by performing Mann-Whitney U-test and only values <0.01 are shown. At day 10, the control group had equivalent viral loads to 5 days of treatment while 10 days of treatment significantly lowered viral load. **(B)** The probability of rebound for different treatment durations. The error bars on each column are 95% confidence interval. **(C)** Samples of viral load trajectories assuming different treatment durations on 4 modeled individuals with equivalent timing of therapy and untreated viral kinetics. Prolonging therapy often avoids rebound.

935  
 936  
 937  
 938  
 939  
 940  
 941  
 942  
 943  
 944  
 945  
 946  
 947



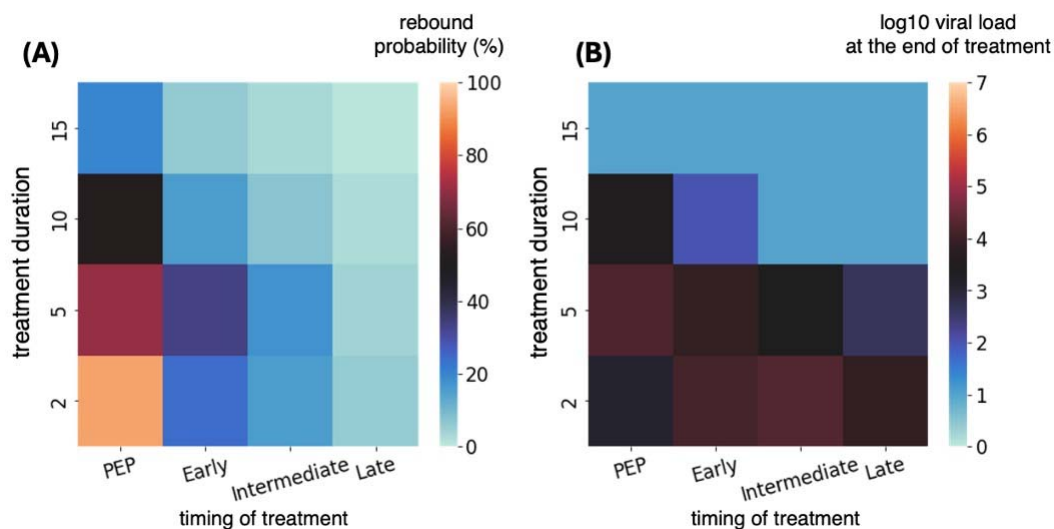

948  
949

950 **Fig. 7. Post-exposure prophylaxis requires more prolonged therapy than early**  
951 **symptomatic therapy to avoid viral rebound. (A) probability of rebound and**  
952 **(B) viral load at the end of the treatment as a function of treatment timing and**  
953 **duration.**

954

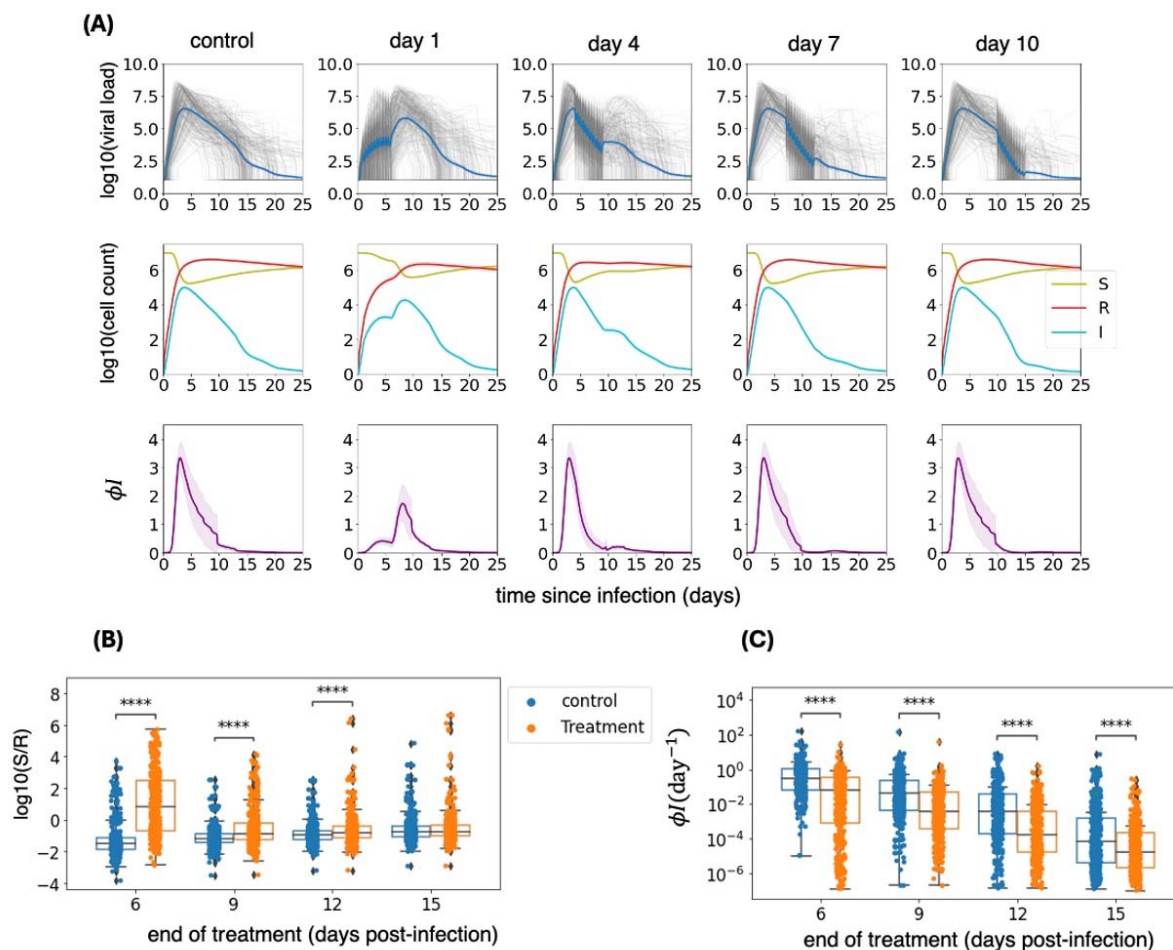

955  
956  
957  
958  
959  
960  
961  
962  
963  
964  
965  
966  
967  
968  
969  
970  
971

**Fig. 8. Early therapy preserves susceptible cells, limits refractory cells, does not eliminate all infected cells, and delays innate immune responses.**

Simulations are performed using time since infection as a variable rather than based on symptoms as in prior figures to eliminate the confounding impact of variable incubation period. **(A)** The top row shows the viral load of all individuals (in grey) and the average viral load (in blue). The middle row shows a less substantial depletion of susceptible cells (S), and lower generation of refractory cells (R) with earlier therapy. The bottom row shows the rate of production of refractory cells likely representing innate immune responses per day with biphasic, lower peak responses noted with early therapy and to a lesser extent in day 4 treated individuals. **(B)** Ratios of susceptible (S) to refractory cells (R) at the end of the 5-day treatment for different timings of treatment. **(C)** Per cell production rate of refractory cells at the end of the 5-day treatment for different timings of treatment.
